1 ***Bacillus sp.* RZ2MS9, a tropical PGPR, colonizes maize endophytically and alters**  
2 **the plant's production of volatile organic compounds both independently and**  
3 **when co-inoculated with *Azospirillum brasilense* Ab-V5**

4

5 Jaqueline Raquel de Almeida<sup>1</sup>, Maria Letícia Bonatelli<sup>1</sup>, Bruna Durante Batista<sup>1,2</sup>,  
6 Natalia Sousa Teixeira-Silva<sup>1</sup>, Mateus Mondin<sup>1</sup>, Rafaela Cristina dos Santos<sup>3</sup>, José  
7 Maurício Simões Bento<sup>3</sup>, Carolina Alessandra de Almeida Hayashibara<sup>1</sup>, João Lúcio  
8 Azevedo<sup>1</sup>, Maria Carolina Quecine<sup>1</sup>

9

10 <sup>1</sup> Department of Genetics, “Luiz de Queiroz” College of Agriculture, ESALQ,  
11 University of São Paulo, Piracicaba - SP, Brazil;

12 <sup>2</sup> Hawkesbury Institute for the Environment, Western Sydney University, Richmond -  
13 NSW, Australia;

14 <sup>3</sup> Department of Entomology, “Luiz de Queiroz” College of Agriculture, ESALQ,  
15 University of São Paulo, Piracicaba - SP, Brazil.

16

17

18 **\*Corresponding author:**

19 E-mail: mquecine@usp.br, Tel. +55 (19) 3429 4251, Fax +55 (19) 3447 8620.

20

21

22 **ABSTRACT**

23 *Bacillus* spp. are among the most efficient known plant growth-promoting rhizobacteria  
24 (PGPR). The PGPR *Bacillus* sp. strain RZ2MS9 is a multi-trait maize growth promoter  
25 previously isolated from guarana plants cultivated in the Amazon rainforest. However,  
26 there are several aspects of its interaction with the host that need further investigation.  
27 To achieve effective performance of microbial inoculants in crop production, it is  
28 necessary to monitor the plant's colonization by a PGPR and to assess the potential  
29 synergy among beneficial strains. Here, we obtained a stable mutant of RZ2MS9  
30 labelled with *green fluorescent protein* (RZ2MS9-GFP). We verified that the insertion  
31 of the plasmid did not affect either bacterial growth nor its ability to promote maize  
32 growth *in vitro*. Using fluorescent microscopy and qPCR, we demonstrated that  
33 RZ2MS9-GFP successfully colonizes maize's roots and leaves endophytically.  
34 Subsequently, we evaluated whether RZ2MS9 has a synergistic effect on plant growth  
35 promotion when co-inoculated with *Azospirillum brasilense* Ab-V5, a commercial  
36 inoculant for maize. The two strains combined enhanced maize's roots and shoots dry  
37 weight by 50.8% and 79.6%, respectively, when compared to the non-inoculated  
38 control. In addition, we used co-inoculation experiments in glass chambers to analyze  
39 the plant's Volatile Organic Compounds (VOCs) production during the maize-RZ2MS9  
40 and maize-RZ2MS9-Ab-V5 interaction. We found that the single and co-inoculation  
41 altered maize's VOCs emission profile, with an increase in the production of indoles in  
42 the co-inoculation. Collectively, these results increase our knowledge about the  
43 interaction between the tropical PGPR *Bacillus* sp. RZ2MS9 and maize, and provide a  
44 new possibility of combined application with the commercial inoculant *A. brasilense*  
45 Ab-V5.

46 **Keywords:** plant growth promoting rhizobacteria; GFP; colonization; co-inoculation;  
47 qPCR; VOCs.

48

49 **Importance**

50 *Bacillus* sp. RZ2MS9 is a PGPR, previously isolated from guarana plants cultivated in  
51 the Brazilian Amazon, which successfully promotes the growth of maize and soybean  
52 plants. To improve our knowledge about the interaction between this very promising  
53 PGPR and maize, we labelled RZ2MS9 with *gfp* and monitored it's maize colonization.  
54 The transformation did not affect either RZ2MS9 growth nor its ability to promote  
55 maize growth *in vitro*. We demonstrated that RZ2MS9 colonizes endophytically  
56 maize's roots and leaves. We also verified that the co-inoculation of RZ2MS9 and  
57 *Azospirillum brasilense* Ab-V5, a known commercial maize inoculant enhanced maize's  
58 roots and shoots growth. Moreover, the co-inoculation altered the maize's volatile  
59 organic compounds, increasing the production of indoles, that is related with decreased  
60 upon the reduction of fertilization. Certainly, our research contributed with better  
61 *Bacillus* sp. RZ2MS9 – maize interaction understanding and also provided new  
62 information concerning RZ2MS9 activity when applied with *A. brasilense* Ab-V5.

63

64

65

## 66 INTRODUCTION

67 Plant growth-promoting rhizobacteria (PGPR) are beneficial bacteria which are able to  
68 establish a symbiotic or nonsymbiotic association with plants in the rhizosphere  
69 (Miransari, 2016). A PGPR can colonize the plant's interior tissues and thrive as  
70 endophytes. The understanding of this process in plants of agricultural importance can  
71 be used to increase crop production (Compant et al., 2008).

72 Once associated with the host, PGPR can improve the plant growth through many  
73 mechanisms, such as producing phytohormones (Patten and Glick, 1996), fixing  
74 biological nitrogen (Hurek et al., 2002), solubilizing phosphorus (Rodriguez et al.,  
75 2004; Vikram and Hamzehzarghani, 2008), improving nutrient absorption (Kraiser et  
76 al., 2011), producing antimicrobial metabolites (Raaijmakers et al., 2002), triggering the  
77 induction of plant systemic resistance (Bakker et al., 2007), as well as modulating plant  
78 growth through the production of volatile organic compounds (VOCs) (Fincheira et al.,  
79 2018). It is known that PGPR can alter the plant's VOC signaling (Santoro et al., 2015;  
80 Cappellari et al., 2017). However, most studies focus on how the emission of microbial  
81 VOCs interfere with plant development (Chowdhury et al., 2018), and not on how the  
82 plant's VOC profile changes upon microbial inoculation.

83 Among the PGPR, members of the Gram-positive endospore-forming *Bacillus* group  
84 are the most commonly reported. Because of the advantages of using *Bacillus* as  
85 inoculants, such as high cell viability and prolonged shelf-life when in formulation, this  
86 group is frequently commercialized (Akinriniola et al., 2018). The *Bacillus* sp. strain  
87 RZ2MS9 is a rhizobacterium isolated from guarana plants (*Paullinia cupana*) cultivated  
88 in the Brazilian Amazon (Batista et al., 2016). The strain appears to have no specificity  
89 for the host plants, successfully promoting the growth of important crops, as maize and  
90 soybean (Batista et al., 2018). The inoculation of RZ2MS9 increased substantially the

91 dry weight of maize shoots and roots compared with the non-inoculated controls. In  
92 soybean, RZ2MS9 also increased the shoot and root's dry weight (Batista et al., 2018).  
93 In addition, plant growth-promoting mechanisms such as indole acetic acid production  
94 (IAA), biological fixation of nitrogen, and phosphate solubilization have been detected  
95 *in vitro* in *Bacillus* sp. RZ2MS9 (Batista et al., 2018). Several genes involved in these  
96 traits were identified in the strain's genome (Batista et al., 2016; Bonatelli et al., 2020).  
97 It is commonly reported that a single PGPR can exhibit more than one of the above-  
98 mentioned plant growth-promoting mechanisms (Ahmad et al., 2008). However, there is  
99 an increasing trend to use products based on microbial consortium, with the aim to  
100 exploit their complementary or even synergistic interactions (Bradáčová et al., 2019).  
101 For instance, the co-inoculation of *Azospirillum* spp. with other PGPR was superior in  
102 increasing the rice growth and yield in contrast with single inoculation (Amutha et al.,  
103 2009). The co-inoculation of two PGPR, *Paenibacillus polymyxa* and *Bacillus*  
104 *megaterium*, and of three rhizobia, IITA-PAU 987, IITA-PAU 983 and CIAT 899, in  
105 different combinations, showed a synergistic effect on the growth of common bean  
106 (*Phaseolus vulgaris* L.) (Korir et al., 2017).  
107 Brazil is the world's third largest maize producer, with an expected production of 95  
108 million tons in the Market Year 2019/2020 (USDA, 2019). The commercial use of  
109 *Azospirillum brasilense* strains Ab-V5 and Ab-V6 on maize crops in Brazil has grown  
110 exponentially since 2010 (Fukami et al., 2017). Inoculants formulated with *A.*  
111 *brasilense* can reduce nitrogen application by up to 25% with increases in maize yield  
112 of up to 30%. The bacterial traits that best explain its beneficial association with cereals  
113 are nitrogen fixation, phytohormones production, mitigation of abiotic stresses, and  
114 control of plant pathogens (Pereira et al., 2020).

115 Considering the beneficial effects of both *Bacillus* sp. RZ2MS9 and *A. brasilense* on  
116 maize development, we hypothesized that their combined application would provide a  
117 more robust effect on maize growth as compared to the single RZ2MS9 application.  
118 Thus, this work aimed to monitor the colonization of *Bacillus* sp. RZ2MS9 in maize  
119 plants and to test the effect of co-inoculating *Bacillus* sp. RZ2MS9 and *A. brasilense*  
120 Ab-V5 on maize's growth and production of VOCs.

121

## 122 **MATERIAL AND METHODS**

### 123 **Bacterial strains and growth conditions**

124 *Bacillus* sp. RZ2MS9, a plant growth-promoting rhizobacteria previously isolated from  
125 guarana (*Paullinia cupana*) (Batista et al., 2016), and its transformant, the GFP-tagged  
126 strain, were routinely grown in Luria-Bertani (LB) medium (Sambrook et al., 1998) at  
127 28 °C, using appropriated antibiotic when necessary. *A. brasilense* Ab-V5, a  
128 commercial maize inoculant (Hungria et al., 2010), was routinely grown in DYGS  
129 medium (Rodriguez et al., 2004) at 28°C. All strains are stored in 20% glycerol at -  
130 80°C. The integrative plasmid pNKGFP (Ferreira et al., 2008) was propagated and  
131 isolated from *E. coli* DH5 $\alpha$ -pir and purified with QIAprep spin miniprep kit (Qiagen)  
132 according to the manufacturer's recommendations.

133

### 134 **Development of stable GFP-tagged RZ2MS9**

#### 135 **Transformation of *Bacillus* sp. RZ2MS9 by electroporation**

136 RZ2MS9 transformants were obtained by electroporation according to the protocol  
137 described by Schurter et al. (1989), with modifications. Briefly, one single colony of  
138 RZ2MS9 was inoculated into 10 ml of LB amended with glycine (0.1%) and incubated  
139 overnight in an incubator shaker at 150 rpm and 28°C. The culture was 100-fold diluted

140 (optical density -  $OD_{550nm} = 0.01$ ) in LB with glycine (0.1 %) and incubated until it  
141 reached the  $OD_{550nm} = 0.2$ . The bacterial cells were harvested by centrifugation and  
142 resuspended twice in 1/40 of the volume in ice-cold electroporation buffer (400 mM  
143 sucrose, 1 mM  $MgCl_2$ , 7 mM phosphate buffer, pH 6.0). Then, the bacterial cells were  
144 resuspended into 2.5 ml of the electroporation buffer and 800  $\mu$ l of the suspension were  
145 distributed into precooled 2 mm cuvettes. The pNKGFP plasmid (30 ng) was also added  
146 into the cuvettes and kept for 10 min at 4°C. The electroporation was performed using  
147 25  $\mu$ F, and 200  $\Omega$ . After electroporation, the cuvettes were maintained for 10 min at  
148 4°C, diluted into 1.2 ml LB and incubated for 2 h at 28°C under agitation (150 rpm).  
149 After this period, the bacterial suspension was spread onto LB plates supplemented with  
150 kanamycin (50  $\mu$ g. $ml^{-1}$ ) and incubated at 28°C for 24 h. One colony was randomly  
151 selected, named RZ2MS9-GFP, grown in LB broth medium containing kanamycin (50  
152  $\mu$ g. $ml^{-1}$ ), and preserved in 20% glycerol at -80°C for further studies.

153

#### 154 **Molecular confirmation of the transformation**

155 One single colony of RZ2MS9 wild-type (wt) and one of the transformant RZ2MS9-  
156 GFP were inoculated into 5 ml of LB medium and maintained overnight at 28°C under  
157 agitation (150 rpm). RZ2MS9-GFP was also grown in LB medium supplemented with  
158 kanamycin (50  $\mu$ g. $ml^{-1}$ ) under the same conditions. Bacterial cells were harvested by  
159 centrifugation and the genomic DNA was extracted using the DNeasy<sup>®</sup> blood and tissue  
160 kit (Qiagen) following the manufacturer's recommendations. The DNA integrity was  
161 verified in agarose gel (1%) stained with 0.5x SYBR<sup>®</sup> Green (Invitrogen<sup>®</sup>) and  
162 quantified in NanoDrop<sup>™</sup> spectrophotometer (NanoDrop Technologies).  
163 To confirm the RZ2MS9-GFP transformation, we amplified the internal region of the  
164 plasmid using the primers: PPNKF (5 'CCTTCATTACAGAAACGGC 3') and

165 PPNKRII (5 'GGTGATGCGTGATCTGATCC 3') (Quecine et al., 2012). The pNKGFP  
166 plasmid was used as a positive control, while the RZ2MS9 wt DNA and a DNA-free  
167 water were used as negative controls. The reaction was performed with 0.75  $\mu$ l of  
168  $MgCl_2$  (25 mM), 0.5 $\mu$ l of dNTP (10  $\mu$ M), 2.5  $\mu$ l of 10X Buffer, 0.5  $\mu$ l of each primer  
169 (10  $\mu$ M), 0.3  $\mu$ l of Taq DNA polymerase, 19  $\mu$ l of water, yielding a final volume of 25 $\mu$ l  
170 per reaction. The PCR program consisted of an initial denaturation step at 94°C for 4  
171 min, followed by 35 cycles of denaturation at 94°C for 30s, annealing at 58°C for 45 s,  
172 and extension at 72°C for 30 s. The final step was a 10 min extension at 72°C. The  
173 amplified products were separated by electrophoresis in an agarose gel (1%) stained  
174 with 0.5x SYBR Green (Invitrogen).

175

#### 176 **Influence of the transformation on the bacterial growth**

177 To evaluate whether the plasmid pNKGFP can affect the transformant growth, the  
178 RZ2MS9 wt and the RZ2MS9-GFP were simultaneously grown in 50 ml of LB medium  
179 (the LB medium was supplemented with kanamycin 50  $\mu$ g.ml<sup>-1</sup> for the transformant  
180 growth). The OD<sub>550nm</sub> of both bacterial cultures was standardized to 0.2 using LB  
181 medium for a final volume of 50 ml. The flasks were then incubated at 28°C under  
182 agitation (150 rpm) and the OD<sub>550nm</sub> was measured every 2, for 10 h, and then at 24 h  
183 and at 48 h after inoculation (h.a.i). The experiment was performed using four  
184 replicates.

185

#### 186 **Influence of the transformation on the bacterium-maize interaction**

187 We evaluated the effect of the *Bacillus* sp. RZ2MS9 wt and of the RZ2MS9-GFP on the  
188 initial development of maize seedlings. The maize seeds, cultivar Dupont Pioneer<sup>®</sup>  
189 P4285H, were washed twice in distilled water and then immersed in the respective



190 bacterial solutions (OD<sub>600</sub>: 0.12) for 30 min. The control treatment consisted of  
191 immersing the washed seeds in LB medium without any bacterial growth.  
192 The treated seeds and the control were seeded onto wet germination paper towels,  
193 placed into Petri dishes, and incubated in the dark at 28°C for 7 d. The assay was  
194 performed using 10 seeds per plate and four replicates (plates) per treatment.  
195 The root system growth was assessed using a scanner. The images of 12 seedlings per  
196 treatment were captured at 400 dpi (dots per inch) resolution with an Epson® Expression  
197 11000XL scanner and analyzed using the software WinRHIZO Arabidopsis (Regent  
198 Instruments Inc., Quebec, Canada). The parameters of root system development  
199 measured were root volume (cm<sup>3</sup>), axial root (cm), lateral root (cm), surface area (cm<sup>2</sup>),  
200 diameter (mm) and length (mm).

201

#### 202 **Maize colonization by RZ2MS9-GFP**

203 Maize colonization by RZ2MS9-GFP was monitored by applying the transformant  
204 culture to the seeds and growing the plants under greenhouse conditions. Seed  
205 inoculation was performed according to Batista et al. (2018), with modifications.  
206 Briefly, culture cells were obtained by growing the RZ2MS9-GFP in 100 ml of LB  
207 supplemented with kanamycin (50 µg.ml<sup>-1</sup>) at 28°C in a shaker incubator (150 rpm)  
208 until it reached the late log phase. The cells were harvested by centrifugation at 4,500 g  
209 for 15 min, washed with phosphate buffer saline - PBS (pH 6.5), and adjusted to a cell  
210 density of 10<sup>8</sup> colony-forming units (CFU).ml<sup>-1</sup>. The seeds, cultivar Dupont Pioneer®  
211 P4285H, were immersed into the bacterial solution for 30 min and then sown. The  
212 control treatment consisted of immersing the seeds into PBS for 30 min. The treated  
213 seeds and the control were seeded in pots containing 1.6 kg of the thick, branny  
214 substrate Bioplant® (<http://www.bioplant.com.br/>), which is composed of peat,

215 correctives, vermiculite, charcoal and pine bark (Bioplant Agrícola Ltda.). The pots  
216 were kept at 28°C and daily irrigated in a greenhouse located at the “Luiz de Queiroz”  
217 College of Agriculture, University of São Paulo, Piracicaba – SP, Brazil (22° 42' 30" S  
218 and 47° 38' 30" W). Six plants per treatment were collected at 15 and at 30 d after  
219 germination (DAG) for further analyzes.

220

### 221 **Quantitative PCR (qPCR)**

222 For quantification by qPCR, the plants collected (both at 15 and at 30 DAG) were  
223 immediately stored at -80°C for later DNA extraction. The total DNA was extracted  
224 using the DNeasy<sup>®</sup> Plant Mini Kit (Qiagen) following the manufacturer's instructions.  
225 The DNA integrity was verified using agarose gel (1%) electrophoresis stained with  
226 0.5x SYBR<sup>®</sup> Green (Invitrogen<sup>®</sup>) and observed under UV light. The DNA  
227 quantification was performed using the NanoDrop<sup>™</sup> spectrophotometer (NanoDrop  
228 Technologies).

229 For RZ2MS9-GFP quantification, we used the primers PPNKF and PPNKRII (Quecine  
230 et al., 2012). The qPCR analysis was performed in 12 µl final volume, containing 6.25  
231 µl of the Platinum<sup>®</sup> qPCR superMix-UDG (Invitrogen), 0.25 µl of each primer - PPNKF  
232 and PPNKRII (10 µM) - and 0.25 µl of Bovine Serum Albumin (BSA). Aliquots of the  
233 master mix (7 µl) were distributed in the wells of a 96-well plate, and 5 ng of DNA was  
234 added as a PCR template. The qPCR cycles consisted of a denaturation step at 95°C for  
235 2 min, 40 cycles at 95°C for 30 s, and a final step at 62°C for 15 s. The quantification  
236 was performed in the iCycler iQ real-time PCR instrument (BioRad Laboratories Inc.).  
237 Three biological replicates and two technical replicates were used.  
238 The standard curve was obtained for each run using a known copy number ( $10^4$  to  $10^{10}$ )  
239 of the linearized plasmid pNKGFP. The bacterial density (CFU per nanogram of total

240 plant DNA) was estimated by interpolation with the standard curve (Quecine et al.,  
241 2012).

242

### 243 **Fluorescence Microscopy (FM)**

244 Immediately after the plant sampling, both at 15 and 30 DAG, root systems and shoots  
245 were cut and observed using the epifluorescence microscope Axiophot II (Zeiss,  
246 Germany). The filter sets (excitation/emission) used were 365/397 nm for blue, 450/515  
247 nm for green, and 546/590 nm for red. The images were digitalized through a PCO  
248 CCD camera using the ISIS Metasystems software (Metasystems, Germany).

249

### 250 **Assessment of maize growth promotion with co-inoculation of RZ2MS9 and Ab-V5**

251 To evaluate whether the Ab-V5 improves the beneficial effect of the RZ2MS9 on maize  
252 growth, cultures of both bacteria were obtained in a final concentration of  $10^8$  CFU.ml<sup>-1</sup>  
253 as previously described (the DYGS medium was used for the strain Ab-V5). The maize  
254 seeds, cultivar Dupont Pioneer<sup>®</sup> P4285H, were immersed into the bacterial solutions for  
255 30 min and then sown. The control treatment consisted of immersing the seeds into PBS  
256 for 30 min.

257 The treated seeds and the control were seeded in pots containing 1.6 kg of the thick,  
258 branny substrate Bioplant<sup>®</sup> (<http://www.bioplant.com.br/>) as previously described. Four  
259 seeds were sown per pot and thinning was performed at 8 DAG, leaving two plants per  
260 pot. At 15 DAG, one plant per pot was collected for the first assessment. The second  
261 assessment was performed at 30 DAG with the remaining plants. In total, six plants  
262 were collected per treatment in each assessment. The roots were separated from the  
263 shoots, washed and kept in pots containing alcohol (70%). The height of the plant  
264 shoots and diameters were measured, and then the shoots were relocated in paper bags.

265 The shoots' dry weight was measured in an analytical balance after oven-drying at 70°C  
266 for 5 d.  
267 The root systems were scattered in a clear layer of water in a tray (30 cm by 20 cm), and  
268 the images were captured at 400 dpi with an Epson® Expression 11000XL professional  
269 scanner system. The obtained images were analyzed using the software WinRHIZO  
270 Arabidopsis (Regent Instruments Inc., Quebec, Canada), as previously described. In  
271 addition, the ten diameter classes provided by the software were simplified in only two:  
272 axial and lateral root length (Trachsel et al., 2009). Therefore, we considered the root  
273 portions with a diameter of less than or equal to 0.5 mm for lateral root length  
274 measurement, and the root portions with a diameter greater than 0.5 mm for axial roots  
275 length measurement. After, the roots were relocated in paper bags and their dry weight  
276 was measured as previously described.

277

### 278 **Volatile-collection system and analyzes**

279 The volatile organic compounds (VOCs) emitted by 15 days-old maize plants were  
280 collected in a system described by Turlings et al. (1998). The maize VOCs were  
281 collected from plants inoculated with RZ2MS9, from plants co-inoculated with  
282 RZ2MS9 and Ab-V5, and from non-inoculated plants (control). Six plants per treatment  
283 were enclosed in glass chambers and connected to the ARS Volatile Collection System  
284 (Analytical Research Systems, Gainesville, FL, USA) through PTFE  
285 (polytetrafluoroethylene) hoses. Clean humid air was first pushed into each glass  
286 chamber with flow of 0.3 L.min<sup>-1</sup>. A column with 30 mg of Hayesep-Q® adsorbent  
287 polymer (Alltech Associates, Deerfield, IL, USA) was connected to each glass chamber.  
288 The chambers were linked with hoses to a vacuum pump that was pulling the air. The  
289 VOCs collection assay was kept for 12h (from 7:00 am to 7:00 pm) in a room with

290 controlled temperature ( $25 \pm 1^\circ\text{C}$ ), relative humidity ( $60 \pm 10\%$ ), and photoperiod (12 h  
291 of light/12 h of dark). After, we eluted the polymer columns with 150 $\mu\text{l}$  hexane and  
292 added 10  $\mu\text{l}$  of nonyl acetate ( $10 \text{ ng}\cdot\mu\text{l}^{-1}$ ) into each sample as an internal standard.  
293 Samples were stored in a freezer at  $-30^\circ\text{C}$  until further analysis.  
294 Two microliters of the samples were injected into a GC-FID, Shimadzu 2010  
295 chromatograph to quantify the maize's emitted VOCs, while 1  $\mu\text{l}$  aliquot was injected  
296 into a GC-MS, Varian 4000 to identify them. Both chromatographs were equipped with  
297 a HP-5 capillary column (30m x 0.25mm x 0.25 $\mu\text{m}$ ) with injector in splitless mode,  
298 flame ionization detector, using helium as a carrier gas ( $24 \text{ cm}\cdot\text{s}^{-1}$ ). The column  
299 temperature was kept at  $40^\circ\text{C}$  for 1 min, increased to  $150^\circ\text{C}$  at a rate of  $5^\circ\text{C}$  per min and  
300 finally increased again at a rate of  $20^\circ\text{C}$  per min until reaching  $250^\circ\text{C}$ . Plant volatiles  
301 were identified by comparing their mass spectra and Kovat index (KI) using n-alkane  
302 (C7–C30) standards (Kovats, 1965) with those of the NIST08 library. Some compounds  
303 had their identity confirmed by comparison with available synthetic standards.

304

### 305 **Statistical analyzes**

306 All data were submitted to analysis of variance followed by Tukey's or t test in the  
307 software R (RCore Team 2017), considering the experimental design as completely  
308 randomized for all bioassays. Differences were considered statistically significant when  
309 the *p-value*  $< 0.05$ . To quantify the bacterium by qPCR, the obtained data were log  
310 transformed to stabilize the variance. VOCs production data were log-transformed and  
311 Pareto-scaled before analysis using Metaboanalyst (Chong et al., 2019).

312

## 313 **RESULTS**

### 314 **Development of the *Bacillus* sp. RZ2MS9 stable GFP-tagged strain**

315 The efficiency of transformation of the PGPR *Bacillus* sp. RZ2MS9 using the pNKGFP  
316 plasmid was  $8.0 \times 10^3$  transformants. $\mu\text{g}$  of plasmid DNA<sup>-1</sup>. The transformation was  
317 confirmed by PCR, which was performed with the specific primers for pNKGFP:  
318 PPNKF and PPNKRII. The electrophoresis gel showed the appropriate size of the  
319 amplicon (~360 pb) (Fig. 1). In addition, the same amplicon was not observed when we  
320 used RZ2MS9 wt DNA as template for PCR amplification.

321 The measurements of bacterial growth revealed that GFP-tagged RZ2MS9 and  
322 RZ2MS9 wt presented the same growth curve pattern, even in the presence of the  
323 antibiotic (Fig. 2). This indicates that the insertion of the plasmid pNKGFP did not have  
324 any impact on the growth behavior of the bacterium. In all conditions, RZ2MS9 strains  
325 started the log phase approximately at 2.5 h h.a.i. and reached the stationary phase at 11  
326 h.a.i..

327 Finally, we found that the bacterial transformation had no influence on the ability of the  
328 *Bacillus* sp. RZ2MS9 to promote the growth of maize roots (Fig. 3). No statistically  
329 significant differences were detected between the treatment inoculated with RZ2MS9 wt  
330 and RZ2MS9-GFP for all of the evaluated parameters. On the other hand, both  
331 RZ2MS9 wt and RZ2MS9-GFP significantly improved the growth of maize roots when  
332 compared to the non-inoculated control for all root parameters evaluated (Fig. 3).

333

### 334 **Maize colonization by the GFP-tagged RZ2MS9**

335 Using qPCR, we quantified the colonization of RZ2MS9-GFP in the maize's roots and  
336 leaves, both at 15 and at 30 DAG. Overall, the number of bacterial cells detected at 30  
337 DAG was lower than at 15 DAG, which could mean a decrease of maize colonization  
338 by RZ2MS9 over time (Fig. 4). The *Bacillus* sp. RZ2MS9-GFP was detected in leaf  
339 cells of inoculated plants, mostly in the chlorenchyma, in both palisade and spongy

340 parenchyma. The tagged strain was also found colonizing the sub-stomata chamber, the  
341 epidermal cells and the xylem vessels of inoculated plants (Fig. 5B and D). A few  
342 RZ2MS9-GFP cells were found in maize root cells (Fig. 5F and H). On the other hand,  
343 no fluorescent GFP-tagged cells were observed in non-inoculated plants collected both  
344 at 15 and at 30 DAG (Fig. 5A, C, E and G). Therefore, the RZ2MS9-GFP was able to  
345 successfully colonize inner tissues of maize roots and leaves, demonstrating an  
346 endophytic behavior.

347

### 348 **Maize growth promotion by the co-inoculation of RZ2MS9 and Ab-V5**

349 Overall, the maize root system was positively affected by both treatments tested  
350 (RZ2MS9 alone and in co-inoculation with Ab-V5). However, the co-inoculation  
351 performed slightly better (Fig. 6). Root diameter and volume were only positively  
352 affected when co-inoculated with both strains. We observed increases of 12.5% and  
353 33.9% in root diameter and volume, respectively, in plants treated with the combination  
354 of both strains (Fig 6D). The dry weight of maize roots was increased by 40.6% and  
355 50.8% when inoculated with RZ2MS9 alone and when in co-inoculation with Ab-V5,  
356 respectively. For the dry weight of shoots, we detected an increase of 66.5% with the  
357 application of RZ2MS9 alone and of 79.6% with the co-inoculation. The RZ2MS9  
358 alone and in combination with Ab-V5 increased maize shoots height by 22.3% and  
359 20.2%, respectively. However, no significant differences among treatments were  
360 detected for root length, root projected area, root surface area, root length per volume,  
361 or stem diameter (Fig 6D).

362

### 363 **Inoculation effect on the production of plant Volatile Organic Compounds (VOCs)**

364 Overall, inoculated maize plants produced more VOCs than non-inoculated plants.  
365 Maize plants inoculated only with RZ2MS9 and maize plants co-inoculated with  
366 RZ2MS9 and Ab-V5 produced 74.04 ng and 27.03 ng of metabolites.gram of dry plant  
367 tissue<sup>-1</sup>, respectively. Whereas non-inoculated maize plants produced 14.89 ng of  
368 metabolites per gram of dry plant tissue. A total of thirty-five VOCs were identified by  
369 GC, which were classified as aldehydes, alcohols, esters, hydrocarbons, monoterpenes,  
370 benzenoids and sesquiterpenes (Table 1). Twenty-seven metabolites significantly  
371 differed ( $p$ -value < 0.01) among the treatments. Eight of them were more abundant in  
372 maize plants that were co-inoculated with RZ2MS9 and Ab-V5: 2-hexanol, 3,4-  
373 dimethyl, dodecane, (E)-3-undecene, (E)-beta-farnesene, (E)-dodecen-1-ol, heptanal,  
374 indole and (Z)-3-hexen-1-ol. On the other hand, the inoculation with only RZ2MS9  
375 enhanced alpha-cubebene production. When comparing inoculated plants (both co-  
376 inoculated and single inoculated) with the non-inoculated control plants, we found that  
377 the metabolites alpha-longipinene, alpha-ylangene, beta-linalol, decanal and nonane  
378 were more abundant in inoculated plants (Table 1).  
379 Interestingly, principal component analysis (PCA) significantly separated the VOCs  
380 profile emitted by co-inoculated maize plants from those emitted by RZ2MS9-  
381 inoculated plants and from non-inoculated control plants (Fig. 7).

382

### 383 **DISCUSSION**

384 The growing public concern on the use of chemicals in agriculture has increased the  
385 demand for efficient plant growth-promoting rhizobacteria (PGPR) as an alternative to  
386 synthetic fertilizers (Mendis et al., 2018). To be effective *in planta*, a PGPR candidate  
387 needs to be able to establish and maintain a sufficient population in the host plant  
388 (Krzyzanowska et al., 2012). Understanding the complex process of plant colonization



389 by a PGPR is a big challenge and requires multiple approaches. However, it is a crucial  
390 step for the evaluation of a potential microbial inoculant.

391 In this study, we investigated the aspects of maize colonization by the *Bacillus* sp.  
392 RZ2MS9 using a polyphasic approach. Electrotransformation was the technique chosen  
393 to tag the RZ2MS9 with the *green fluorescent protein* (GFP). The transformation  
394 protocol used was efficient in inserting the integrative plasmid pNKGFP into the  
395 bacterial genome. This plasmid was first used to tag *Pantoea agglomerans* strain 33.1 in  
396 order to track its colonization in *Eucalyptus* seedlings (Ferreira et al., 2008). Later, this  
397 same tagged strain was monitored during the sugarcane interaction, showing a cross-  
398 colonization ability of the strain (Quecine et al., 2012). The bacterial pathogen *Leifsonia*  
399 *xyli* subsp. *xyli*, causal agent of ratoon stunting disease in sugarcane, was also  
400 transformed with the pNKGFP. The monitoring of the transformant Lxx::pNKGFP  
401 revealed some new colonization niches in sugarcane tissues by this pathogen (Quecine  
402 et al., 2016).

403 Here, we selected one transformant, named RZ2MS9-GFP, to be monitored during  
404 maize colonization. The tagged strain had only one integrative copy of the plasmid (data  
405 not shown), and measurement of bacterial growth showed that both GFP-tagged and the  
406 wild type (wt) RZ2MS9 exhibited the same growth curve pattern. It is known that the  
407 expression of new introduced genes may disturb normal cellular process (Wu et al.,  
408 2016). In fact, the endophyte *Pseudomonas putida* W619 presented a negative effect on  
409 poplar plants health and growth when GFP-labelled (Weyens et al., 2012). However,  
410 both the wild type and the GFP-tagged mutant of the diazotroph *Paenibacillus*  
411 *polymyxa* P2b-2R were able to promote the growth of pine (Tang et al., 2017), canola  
412 (Padda et al., 2016), and maize (Padda et al., 2017). In our work, a maize seed  
413 germination test was performed to ensure that the transformation did not affect the

414 ability of RZ2MS9-GFP to promote the plant growth. We confirmed that both the  
415 RZ2MS9 wt and the RZ2MS9-GFP strains had the same performance when improving  
416 the maize root system growth as compared to the non-inoculated control.  
417 The qPCR and fluorescence microscopy analyses revealed that the RZ2MS9-GFP was  
418 able to colonize internal tissues of maize plants, such as roots and leaves, demonstrating  
419 the bacterial endophytic behavior. Many efficient PGPR were reported inhabiting  
420 internal plant tissues (Hardoim et al., 2008). The *Burkholderia* sp. strain PsJN::*gfp2x*  
421 colonized *Vitis vinifera* L. cv. Chardonnay from the roots to the leaves (Compant et al.,  
422 2005). Since RZ2MS9 is a rhizobacteria (Batista et al., 2018), we hypothesis that the  
423 RZ2MS9-GFP penetrated the plant through the roots and migrated through the xylem to  
424 colonize the shoots and reach the leaves. Similarly, Hao and Chen (2017) GFP-tagged  
425 the PGPR *P. polymyxa* strain WLY78 and evaluated its colonization in maize. The  
426 authors observed that the strain was able to colonize the whole plant, detecting it in the  
427 cells of the roots, in the vascular system, and in the leaves.  
428 Recent studies have shown that the adaptability and performance of bacterial inoculants  
429 could be improved by using mixed inoculants of multiple microbes, which are also  
430 known as microbial consortia (Sohaib et al., 2020). Here, we showed that the  
431 combination of RZ2MS9 with the *A. brasilense* strain Ab-V5 improved the effect of the  
432 *Bacillus* in promoting maize growth, suggesting a synergistic interaction between the  
433 tested strains. The co-inoculation was particularly effective in increasing root diameter  
434 and volume, which probably led to the overall increased dry weight of the maize shoots.  
435 Similarly, the co-inoculation of four PGPR, the *Pseudomonas putida* KT2440, the  
436 *Sphingomonas* sp. OF178, the *A. brasilense* Sp7 and the *Acinetobacter* sp. EMM02,  
437 demonstrated higher performance in promoting maize growth when compared to single  
438 and non-inoculated treatments (Molina-Romero et al., 2017). Cassán et al. (2009)

439 observed that the co-inoculation of maize seeds with *A. brasilense* Az39 and  
440 *Bradyrhizobium japonicum* E109 resulted in the improvement of shoot length and of the  
441 shoot and root dry weight.

442 Different mechanisms can be involved in the plant growth-promotion triggered by a  
443 PGPR. In addition to all the previously demonstrated plant growth promoting traits  
444 displayed by the RZ2MS9, its positive effect on maize growth shown in the present  
445 study (both in the seed germination test and in the greenhouse assay) may be related  
446 with the carbon/nitrogen balance (Osuna et al., 2015). It is known that the  
447 carbon/nitrogen balance is crucial for the regulation of gene expression of pathways  
448 related to seed germination and plant development (Osuna et al., 2015). Several genes  
449 related to nitrogen metabolism were identified in the *Bacillus* sp. RZ2MS9 genome,  
450 among them the nitric oxide synthase oxygenase (*nos*), which catalyzes the production  
451 of nitric oxide (NO), and the nitrite transporter (*nirC*), which catalyzes the nitrite uptake  
452 and export across the cytoplasmic membrane (Bonatelli et al., 2020). The *A. brasilense*  
453 Ab-V5 also presents nitrogen fixation genes *nif* and *fix* which confer its ability to fix  
454 atmospheric nitrogen (Hungria et al., 2018). Moreover, both RZ2MS9 and Ab-V5 are  
455 indole-acetic acid (IAA) producers and carry genes related to the synthesis of this  
456 phytohormone in their genomes (Batista et al., 2018; Hungria et al., 2018).

457 In addition to the promotion of maize growth, the inoculation of RZ2MS9 alone and in  
458 combination with Ab-V5 altered the plant's emission and composition of VOCs. Other  
459 works reported the same effect for different plant species when inoculated with PGPR  
460 (Santoro et al., 2015; Cappellari et al., 2017). The difference in plants' VOCs emissions  
461 may have been caused by several reasons, such as the bacterial production of  
462 metabolites or the bacterial metabolization of VOCs produced by the plant, or it could

463 be due to a change in the plant metabolism upon bacterial colonization (Ferré-Armengol  
464 et al., 2016).

465 The alteration in the plants' VOCs emissions can even affect the way the plant interacts  
466 with its surroundings. Plants use VOCs to communicate with other plants, which is also  
467 a form of cross-kingdom communication (Farmer et al., 2001). Changes in secondary  
468 metabolites, such as in the VOCs, are also often involved in plant defense mechanisms.

469 The inoculation of RZ2MS9 and Ab-V5, both in single and in co-inoculation, enhanced  
470 the production of different terpenoids, especially those belonging to the sesquiterpene  
471 and monoterpene class. Terpenoids are among the major constituents of plant's VOCs  
472 emissions and they are related with indirect plant defense via tritrophic interactions  
473 (Das, 2013). The enhancement of emitted terpenoids upon PGPR inoculation is  
474 common (Banchio et al., 2009; Cappellari et al., 2013; Santoro et al., 2015).

475 We also observed that upon co-inoculation of RZ2MS9 and Ab-V5, the indole  
476 production was significantly enhanced when compared with the RZ2MS9 single  
477 inoculation and with the control. Indole is a benzenoid compound and a precursor of the  
478 amino acid tryptophan. Ballhorn et al. (2013) showed that rhizobia-colonized lima bean  
479 plants presented high production of indole and they hypothesized that the enhanced  
480 nitrogen availability from the rhizobia may be the reason for this. In fact, maize's  
481 production of indole and other VOCs decreased upon the reduction of fertilization  
482 (Gouinguéné and Turlings, 2002). In our work, the co-colonization may be playing an  
483 important role in maize plant nutrition and this will be further investigated.

484 Understanding the complex process of plant colonization by a PGPR is crucial to  
485 develop a more effective microbial inoculant for crops. This work not only increases  
486 knowledge about the interaction between *Bacillus* sp. RZ2MS9 and maize crops, but  
487 also provides a new possibility of its combined application with the commercial

488 inoculant *Azospirillum brasilense*. The co-inoculation enhanced plant growth, favoring  
489 especially the root system, and altered the plants' VOCs production. Future works will  
490 focus on understanding the molecular mechanisms involved in the interaction between  
491 the maize plant and this microbial consortium.

492

#### 493 **ACKNOWLEDGEMENTS**

494 This work was supported by grants from the São Paulo Research Foundation - FAPESP  
495 (Proc. No. 2015/01188-9 and 2014/50871-0) and National Council for Scientific and  
496 Technological Development - CNPq (Proc. No. 465511/2014-7). We would like to  
497 thank FAPESP for the fellowships granted to Jaqueline Raquel de Almeida (Proc. N.  
498 2016/16868-8) and Rafaela Cristina dos Santos (Proc. No. 2016/1795-2). We also thank  
499 Coordination for the Improvement of Higher Education Personnel-CAPES for the  
500 fellowship granted to Maria Leticia Bonatelli (Proc. N. 88882.317565/2019-01) and  
501 CNPq for the fellowship granted to Carolina Alessandra de Almeida Hayashibara (Proc.  
502 N. 140587/2018-7).

503 **REFERENCES**

- 504 Ahmad F, Ahmad I, Khan MS. 2008. Screening of free-living rhizospheric bacteria for  
505 their multiple plant growth-promoting activities. *Microbiol Res* 163:173-181.  
506 <http://dx.doi.org/10.1016/j.micres.2006.04.001>.
- 507 Akinrinlola RJ, Yuen GY, Drijber RA, Adesemoye AO. 2018. Evaluation of *Bacillus*  
508 strains for plant growth promotion and predictability of efficacy by *in vitro*  
509 physiological traits. *Int J Microbiol* 2018:11. <https://doi.org/10.1155/2018/5686874>.
- 510 Amutha G, Sivakumaar PK, Joe MM. 2009. Development and use of *Azospirillum* co-  
511 aggregates using certain cationic ions and its bioinoculation effect on rice growth and  
512 yield. *J Agric Res* 47:107–119.
- 513 Bakker PA, Pieterse CM, Van Loon LC. 2007. Induced systemic resistance by  
514 fluorescent *Pseudomonas* spp.. *Phytopathology* 97:239-243.  
515 <http://dx.doi.org/10.1094/PHYTO-97-2-0239>.
- 516 Ballhorn DJ, Kautz S, Schädler M. 2013. Induced plant defense via volatile production  
517 is dependent on rhizobial symbiosis. *Oecologia* 172(3):833-846.  
518 <http://dx.doi.org/10.1007/s00442-012-2539-x>.
- 519 Banchio E, Xie X, Zhang H, Pare PW. 2009. Soil bacteria elevate essential oil  
520 accumulation and emissions in sweet basil. *J Agr Food Chem* 57(2):653-657.  
521 <http://dx.doi.org/10.1021/jf8020305>.
- 522 Batista BD, Taniguti LM, Almeida JR, Azevedo JL, Quecine MC. 2016. Draft Genome  
523 Sequence of Multitrait Plant Growth-Promoting *Bacillus* sp. Strain RZ2MS9. *Genome*  
524 *Announc* 4: (6). <https://doi.org/10.1128/genomeA.01402-16>.
- 525 Batista BD, Lacava PT, Ferrari A, Teixeira-Silva NS, Bonatelli ML, Tsui S, Mondin M,  
526 Kitajima EW, Pereira JO, Azevedo JL, Quecine MQ. 2018. Screening of tropically  
527 derived, multi-trait plant growth-promoting rhizobacteria and evaluation of corn and

- 528 soybean colonization ability. *Microbiol Res* 206:33–42.
- 529 <https://doi.org/10.1016/j.micres.2017.09.007>.
- 530 Bonatelli ML, Li J, Dumaresq A, Quecine MC, Settles ML. 2020. Complete genome  
531 sequence of *Bacillus* sp. strain RZ2MS9, a multitrait plant growth promoter. *Microbiol*  
532 *Resour Announc* 9:e00623-20. <https://doi.org/10.1128/MRA.00623-20>.
- 533 Bradáčová K, Florea AS, Bar-Tal A, Minz D, Yermiyahu U, Shawahna R, Kraut-Cohen  
534 J, Zolti A, Erel R, Dietel K, Weinmann M, Zimmermann B, Berger N, Ludwig U,  
535 Neumann G, Pošta G. 2019. Microbial consortia versus single-strain inoculants: an  
536 advantage in PGPM-assisted tomato. *Prod Agron* 9:105.  
537 <https://doi.org/10.3390/agronomy9020105>.
- 538 Cappellari L, Santoro MV, Nieves F, Giordano W, Banchio E. 2013. Increase of  
539 secondary metabolite content in marigold by inoculation with plant growth-promoting  
540 rhizobacteria. *Appl Soil Ecol* 70:16-22. <https://doi.org/10.1016/j.apsoil.2013.04.001>.
- 541 Cappellari LR, Chiappero J, Santoro MV, Giordano W, Banchio E. 2017. Inducing  
542 phenolic production and volatile organic compounds emission by inoculating *Mentha*  
543 *piperita* with plant growth-promoting rhizobacteria. *Sci Hortic* 220:193-198.  
544 <https://doi.org/10.1016/j.scienta.2017.04.002>.
- 545 Cassán F, Perrig D, Sgroy V, Masciarelli O, Penna C, Luna V. 2009. *Azospirillum*  
546 *brasilense* Az39 and *Bradyrhizobium japonicum* E109, inoculated singly or in  
547 combination, promote seed germination and early seedling growth in corn (*Zea mays*  
548 L.) and soybean (*Glycine max* L.). *Eur J Soil Biol* 45:28-35.  
549 <https://doi.org/10.1016/j.ejsobi.2008.08.005>.
- 550 Chong J, Wishart DS, Xia J. 2019. Using metaboanalyst 4.0 for comprehensive and  
551 integrative metabolomics data analysis. *Curr Protoc Bioinformatics* 68:128.  
552 <https://doi.org/10.1002/cpbi.86>.

- 553 Chowdhury FT, Islam MR, Islam MR, Khan H. 2019. Diversity of Plant Endophytic  
554 Volatile Organic Compound (VOC) and Their Potential Applications. *In* Jha S. (ed)  
555 Endophytes and Secondary Metabolites. Reference Series in Phytochemistry. Springer,  
556 Cham. [https://doi.org/10.1007/978-3-319-90484-9\\_10](https://doi.org/10.1007/978-3-319-90484-9_10).
- 557 Compant S, Reiter B, Sessitsch A, Nowak J, Clément C, Ait Barka E. 2005. Endophytic  
558 colonization of *Vitis vinifera* L. by plant growth-promoting bacterium *Burkholderia* sp.  
559 strain PsJN. *Appl Environ Microbiol* 71:1685–1693.  
560 <http://dx.doi.org/10.1128/AEM.71.4.1685>.
- 561 Compant S, Kaplan H, Sessitsch A, Nowak J, Ait Barka E, Clément C. 2008.  
562 Endophytic colonization of *Vitis vinifera* L. by *Burkholderia phytofirmans* strain PsJN:  
563 from the rhizosphere to inflorescence tissues. *FEMS Microbiol Ecol* 63(1):84-93.  
564 <https://doi.org/10.1111/j.1574-6941.2007.00410.x>.
- 565 Das A, Lee SH, Hyun TK, Kim SW, Kim JY. 2013. Plant volatiles as method of  
566 communication. *Plant Biotechnol Rep* 7(1): 9-26. [http://dx.doi.org/10.1007/s11816-012-](http://dx.doi.org/10.1007/s11816-012-02361)  
567 02361.
- 568 Farmer EE. 2001. Surface-to-air signals. *Nature* 411(6839):854-856.  
569 <https://doi.org/10.1038/35081189>.
- 570 Ferré-Armengol G, Filella I, Llusia J, Peñuelas J. 2016. Bidirectional interaction  
571 between phyllospheric microbiotas and plant volatile emissions. *Trends Plant Sci*  
572 21(10):854-860. <https://doi.org/10.1016/j.tplants.2016.06.005>.
- 573 Ferreira A, Quecine MC, Lacava PT, Azevedo JL, Shinitiro O, Araújo WL. 2008.  
574 Diversity of endophytic bacteria from *Eucalyptus* species seeds and colonization of  
575 seedlings by *Pantoea agglomerans*. *FEMS Microbiol Lett* 287:8-14.  
576 <https://doi.org/10.1111/j.1574-6968.2008.01258.x>.



- 577 Fincheira P, Quiroz A. 2018. Microbial volatiles as plant growth inducers. *Microbiol*  
578 *Res* 208:63-75. <https://doi.org/10.1016/j.micres.2018.01.002>.
- 579 Fukami J, Ollero FJ, Megías M, Hungria M. 2017. Phytohormones and induction of  
580 plant-stress tolerance and defense genes by seed and foliar inoculation with  
581 *Azospirillum brasilense* cells and metabolites promote maize growth. *AMB Express*  
582 7:153. <https://doi.org/10.1186/s13568-017-0453-7>.
- 583 Gouinguéné SP, Turlings TC. 2002. The effects of abiotic factors on induced volatile  
584 emissions in corn plants. *Plant Physiol* 129(3):1296-1307.  
585 <https://doi.org/10.1104/pp.001941>.
- 586 Hao T, Chen, S. 2017. Colonization of wheat, maize and cucumber by *Paenibacillus*  
587 *polymyxa* WLY78. *PLoS One* 12:e0169980.  
588 <https://doi.org/10.1371/journal.pone.0169980>.
- 589 Hardoim PR, van Overbeek LS, van Elsas JD. 2008. Properties of bacterial endophytes  
590 and their proposed role in plant growth. *Trends Microbiol* 16:463–471.  
591 <http://dx.doi.org/10.1016/j.tim.2008.07.008>.
- 592 Hungria M, Campo RJ, Souza EM, Pedrosa FO. 2010. Inoculation with selected strains  
593 of *Azospirillum brasilense* and *A. lipoferum* improves yields of maize and wheat in  
594 Brazil. *Plant Soil* 331:413–425. <https://doi.org/10.1007/s11104-009-0262-0>.
- 595 Hungria M, Ribeiro RA, Nogueira MA. 2018. Draft genome sequences of *Azospirillum*  
596 *brasilense* strains Ab-V5 and Ab-V6, commercially used in inoculants for grasses and  
597 legumes in Brazil. *Genome Announc* 6:e00393-18.  
598 <https://doi.org/10.1128/genomeA.00393-18>.
- 599 Hurek T, Handley LL, Reinhold-Hurek B, Piché Y. 2002. *Azoarcus* grass endophytes  
600 contribute fixed nitrogen to the plant in an unculturable state. *Mol Plant-Microbe*  
601 *Interact* 15:233-242. <https://doi.org/10.1094/MPMI.2002.15.3.233>.

- 602 Korir H, Mungai NW, Thuita M, Hamba Y, Masso C. 2017. Co-inoculation effect of  
603 *Rhizobia* and plant growth-promoting rhizobacteria on common bean growth in a low  
604 phosphorus soil. *Front Plant Sci* 8:141. <https://doi.org/10.3389/fpls.2017.00141>.
- 605 Kovats E. 1965. Gas chromatographic characterization of organic substances in the  
606 retention index system, p 229-247. *In* Giddings JC, Keller RA (ed), *Advances in*  
607 *Chromatography*, Marcel Dekker, New York.
- 608 Kraiser T, Gras DE, Gutiérrez AG, González B, Gutiérrez RA. 2011. A holistic view of  
609 nitrogen acquisition in plants. *J Exp Bot* 62(4):1455-1466.  
610 <https://doi.org/10.1093/jxb/erq425>.
- 611 Krzyzanowska D, Obuchowski M, Bikowski M, Rychlowski M, Jafra S. 2012.  
612 Colonization of potato rhizosphere by GFP-tagged *Bacillus subtilis* MB73/2,  
613 *Pseudomonas* sp. P482 and *Ochrobactrum* sp. A44 shown on large sections of roots  
614 using enrichment sample preparation and confocal laser scanning microscopy. *Sensors*  
615 (Basel) 12:17608–17619. <https://doi.org/10.3390/s121217608>.
- 616 Mendis HC, Thomas VP, Schwientek P, Salamzade R, Chien JT, Waidyaratne P,  
617 Kloepper J, De La Fuente L. 2018. Strain-specific quantification of root colonization by  
618 plant growth promoting rhizobacteria *Bacillus firmus* I-1582 and *Bacillus*  
619 *amyloliquefaciens* QST713 in non-sterile soil and field conditions. *PLoS One* 13(2):  
620 e0193119. <https://doi.org/10.1371/journal.pone.0193119>.
- 621 Miransari M. 2016. Environmental Stresses. *In* Miransari M. (ed) *Soybean Production:*  
622 *Soybean Production Volume 2 (Vol. 2)*. Academic Press.
- 623 Molina-Romero D, Baez A, Quintero-Hernández V, Castañeda-Lucio M, Fuentes-  
624 Ramírez LE, Bustillos-Cristales MDR, Rodríguez-Andrade O, Morales-García YE,  
625 Munive A, Muñoz-Rojas J. 2017. Compatible bacterial mixture, tolerant to desiccation,

- 626 improves maize plant growth. PLoS One. 12:e0187913.  
627 <https://doi.org/10.1371/journal.pone.0187913>.
- 628 Osuna D, Prieto P, Aguilar M. 2015. Control of seed germination and plant  
629 development by carbon and nitrogen availability. Front Plant Sci 6:1023.  
630 <https://doi.org/10.3389/fpls.2015.01023>.
- 631 Padda KP, Puri A, Chanway CP. 2016. Plant growth promotion and nitrogen fixation in  
632 canola (*Brassica napus*) by an endophytic strain of *Paenibacillus polymyxa* and its  
633 GFP-tagged derivative in a long-term study. Botany 94(12):1209-1217.  
634 <https://doi.org/10.1139/cjb-2016-0075>.
- 635 Padda KP, Puri A, Zeng Q, Chanway CP, Wu X. 2017. Effect of GFP-tagging on  
636 nitrogen fixation and plant growth promotion of an endophytic diazotrophic strain of  
637 *Paenibacillus polymyxa*. Botany 95(9):933-942. <https://doi.org/10.1139/cjb-2017-0056>.
- 638 Patten CL, Glick BR. 1996. Bacterial biosynthesis of indole-3-acetic acid. Can J  
639 Microbiol 42:207–220. <http://dx.doi.org/10.1139/m96-032>.
- 640 Pereira LC, Bertuzzi Pereira C, Correia LV, Matera TC, Santos RF, Carvalho C, Osipi  
641 EAF, Braccini AL. 2020. Corn Responsiveness to *Azospirillum*: Accessing the effect of  
642 root exudates on the bacterial growth and its ability to fix nitrogen. Plants 9:923.  
643 <https://doi.org/10.3390/plants9070923>.
- 644 Quecine MC, Araújo WL, Rossetto PB, Ferreira A, Tsui S, Lacava PT, Mondin M,  
645 Azevedo JL, Pizzirani-Kleiner AA. 2012. Sugarcane growth promotion by the  
646 endophytic bacterium *Pantoea agglomerans* 33.1. Appl Environ Microbiol 78:7511–  
647 7518. <https://doi.org/10.1128/AEM.00836-12>.
- 648 Quecine MC, Silva TM, Carvalho G, Saito S, Mondin M, Teixeira-Silva NS, Camargo  
649 LEA, Monteiro-Vitorello CB. 2016. A stable *Leifsonia xyli* subsp. *xyli* GFP-tagged

- 650 strain reveals a new colonization niche in sugarcane tissues. *Plant Pathol* 65:154-162.  
651 <https://doi.org/10.1111/ppa.12397>.
- 652 R Core Team. 2017. R: A language and environment for statistical computing. R  
653 Foundation for Statistical Computing, Vienna, Austria. URL [https://www.R-](https://www.R-project.org/)  
654 [project.org/](https://www.R-project.org/).
- 655 Raaijmakers JM, Vlami M, de Souza JT. 2002. Antibiotic production by bacterial  
656 biocontrol agents. *Antonie van Leeuwenhoek* 81:537–547.  
657 <https://doi.org/10.1023/A:1020501420831>.
- 658 Rodriguez H, Gonzalez T, Goire I, Bashan Y. 2004. Gluconic acid production and  
659 phosphate solubilization by the plant growth-promoting bacterium *Azospirillum* spp..  
660 *Naturwissenschaften* 91:552-555. <https://doi.org/10.1007/s00114-004-0566-0>.
- 661 Sambrook J, Fritsch EF, Maniatis T. 1989. Molecular cloning, a laboratory manual, 2nd  
662 ed. Cold Spring Harbor, NY: Cold Spring Harbor Laboratory.
- 663 Santoro MV, Cappellari L, Giordano W, Banchio E. 2015. Systemic induction of  
664 secondary metabolite biosynthesis in medicinal aromatic plants mediated by  
665 rhizobacteria, p 263-285. *In* Egamberdieva D, Shrivastava S, Varma A (ed) *Plant-*  
666 *Growth-Promoting Rhizobacteria (PGPR) and Medicinal Plants*. Springer, Cham.
- 667 Schurter W, Geiser M, Mathé D. 1989. Efficient transformation of *Bacillus*  
668 *thuringiensis* and *B. cereus* via electroporation: Transformation of acrySTALLIFEROUS  
669 strains with a cloned delta-endotoxin gene. *Mol Gen Genet* 218:177-181.  
670 <https://doi.org/10.1007/BF00330581>.
- 671 Sohaib M, Zahir ZA, Khan MY, Ans M, Asghar HN, Yasin S, Al-Barakah FNI. 2020.  
672 Comparative evaluation of different carrier-based multi-strain bacterial formulations to  
673 mitigate the salt stress in wheat. *Saudi J Biol Sci* 27: 777-787.  
674 <https://doi.org/10.1016/j.sjbs.2019.12.034>.

- 675 Tang Q, Puri A, Padda KP, Chanway CP. 2017. Biological nitrogen fixation and plant  
676 growth promotion of lodgepole pine by an endophytic diazotroph *Paenibacillus*  
677 *polymyxa* and its GFP-tagged derivative. *Botany* 95(6):611-619.  
678 <https://doi.org/10.1139/cjb-2016-0300>.
- 679 Trachsel S, Messmer R, Stamp P, Hund A. 2009. Mapping of QTLs for lateral and axile  
680 root growth of tropical maize. *Theor Appl Genet* 119:1413-1424.  
681 <https://doi.org/10.1007/s00122-009-1144-9>.
- 682 Turlings TCJ, Lengwiler UB, Bernasconi, ML, Wechsler D. 1998. Timing of induced  
683 volatile emissions in maize seedlings. *Planta* 207:146–152.  
684 <https://doi.org/10.1007/s004250050466>.
- 685 USDA. 2019. United States Department of Agriculture. Global Agricultural Information  
686 Network.  
687 <https://apps.fas.usda.gov/newgainapi/api/report/downloadreportbyfilename?filename=G>  
688 [rain%20and%20Feed%20Annual\\_Brasilia\\_Brazil\\_4-8-2019.pdf](https://apps.fas.usda.gov/newgainapi/api/report/downloadreportbyfilename?filename=G). Retrieved 30  
689 September 2019.
- 690 Vikram A, Hamzehzarghani H. 2008. Effect of phosphate solubilizing bacteria on  
691 nodulation and growth parameters of Greengram (*Vigna radiata* L. Wilczek). *Res J*  
692 *Microbiol* 3:62–72. <https://doi.org/10.3923/jm.2008.62.72>.
- 693 Weyens N, Boulet J, Adriaensen D, Timmermans JP, Prinsen E, Van Oevelen S,  
694 Vangronsveld J. 2012. Contrasting colonization and plant growth promoting capacity  
695 between wild type and a gfp-derivative of the endophyte *Pseudomonas putida* W619 in  
696 hybrid poplar. *Plant Soil* 356 (1-2): 217-230. <https://doi.org/10.1007/s11104-011-0831->  
697 x.

698 Wu G, Yan Q, Jones JA, Tang YJ, Fong SS, Koffas MA. 2016. Metabolic burden:  
699 cornerstones in synthetic biology and metabolic engineering applications. Trends  
700 Biotechnol 34(8):652-664. <https://doi.org/10.1016/j.tibtech.2016.02.010>

701 **Fig. 1.** Molecular confirmation of the *Bacillus* sp. RZ2MS9 GFP-tagged transformants  
702 by PCR amplification using the primers PPNKF (5 'CCTTCATTACAGAAACGGC 3')  
703 and PPNKRII (5 'GGTGATGCGTGATCTGATCC 3'). Lanes: **(M)** DNA ladder 1kb  
704 (Fermentas<sup>®</sup>); **(1-6)** RZ2MS9-GFP transformants; **(7)** RZ2MS9 wild type (negative  
705 control); **(8)** DNA-free water (blank control); **(9)** pNKGFP plasmid (positive control).  
706

707 **Fig. 2.** Bacterial growth curves of the RZ2MS9-GFP and of the RZ2MS9 wild type. All  
708 strains were grown in 50 ml of Luria Bertani (LB) broth medium, however the growth  
709 of the RZ2MS9-GFP was also evaluated in LB supplemented with kanamycin - kn (50  
710  $\mu\text{g}\cdot\text{ml}^{-1}$ ). The bacterial growth, using four replicates per strain/condition, was estimated  
711 by measuring the Optical Density (OD) at 600nm every 2h, for 10h, and then at 24 and  
712 48 hours after inoculation (h.a.i).  
713



714 **Fig. 3:** *In vitro* seed germination assay of maize (cultivar Dupont Pioneer<sup>®</sup> P4285H)  
715 inoculated with RZ2MS9 wt and RZ2MS9-GFP. The germination assessment was  
716 performed 7 days after bacterial inoculation of maize seeds in wet germination paper  
717 towels **(A)**. The maize root system images were captured at 400 dpi resolution with the  
718 Epson<sup>®</sup> Expression 11000XL scanner **(B)**. The images were analyzed using the software  
719 WinRHIZO Arabidopsis, and the root parameters evaluated were: **(C)** root volume  
720 (cm<sup>2</sup>); **(D)** root surface area (cm<sup>2</sup>); **(E)** root diameter (mm); **(F)** axial root length (cm);  
721 **(G)** lateral root length (cm); **(H)** total root length (mm). Mean values (12 replicates per  
722 treatment) with the same letter are not significantly different ( $P > 0.05$ ) according to  
723 Tukey's test.  
724  
725

726 **Fig. 4.** *Bacillus* sp. RZ2MS9-GFP abundance in different maize tissues during plant  
727 colonization. The bacterial cells were measured by qPCR at 15 and at 30 days after  
728 germination (DAG). The abundance data, in CFU/ng of DNA, were log-transformed to  
729 stabilize the variance. Data are presented as mean  $\pm$  SE ( $n=3$ ).  
730

731 **Fig. 5.** Fluorescence microscopy images of maize leaves and roots. The plants were  
732 inoculated or not with the *Bacillus* sp. RZ2MS9 tagged with green fluorescent protein  
733 (GFP)-expressing plasmid (RZ2MS-GFP). The transversal sections were performed in  
734 the tissues of maize collected at 15 and at 30 days after germination (DAG). The arrows  
735 indicate RZ2MS9-GFP cells in the leaves (**B and D**) and roots (**F and H**) of inoculated  
736 plants. No fluorescent bacterial cells were detected in the leaves (**A and C**) and roots (**E**  
737 **and G**) of non-inoculated control plants. The magnifications used were 100, 200 or 400  
738 X.  
739

740 **Fig. 6.** Effect on several growth parameters of 30-day old maize after inoculation with  
741 *Bacillus* sp. RZ2MS9 alone (**B**) and in co-inoculation with *Azospirillum brasilense* Ab-  
742 V5 (**C**), in contrast with the non-inoculated control (**A**). The data represent the means of  
743 6 replicates per treatment  $\pm$  the standard error. Asterisks indicate significant differences  
744 from the non-inoculated control according to the t-test (p-value <0.01) (**D**).  
745

746 **Fig. 7.** Principal component analysis of the volatile organic compounds (VOCs)  
747 emission patterns released by maize plants when inoculated with the combination of  
748 *Bacillus* sp. RZ2MS9 and *Azospirillum brasilense* Ab-V5 (RZ2MS9-Ab-V5) (in red);  
749 the *Bacillus* sp. RZ2MS9 alone (in green), and with no bacterial inoculation – control  
750 (in blue). Shaded areas represent the 95% confidence interval, and the explained  
751 variances are shown in brackets.  
752

753 **Table 1.** Volatile organic compound (VOC) production by maize single or co-inoculated with *Bacillus* sp. RZ2MS9 and *Azospirillum brasilense*

754 Ab-V5

| Class            | R.T. (min) | Retention index | Compound               | p-value  | Fisher's LSD | RZ2MS9* | Ab-v5 - RZ2MS9* | Control * |
|------------------|------------|-----------------|------------------------|----------|--------------|---------|-----------------|-----------|
| <i>Aldehydes</i> |            |                 |                        |          |              |         |                 |           |
|                  | 6.49       | 784.26          | Hexanal**              | N. S.    | N. S.        | 0.74    | 0.60            | 0.56      |
|                  | 9.42       | 880.34          | Heptanal               | 1.60e-05 | 4.00e-05     | 0.00    | 0.14            | 0.00      |
|                  | 12.12      | 980.75          | Octanal                | 3.16e-08 | 1.58e-07     | 0.00    | 0.00            | 0.18      |
|                  | 19.27      | 1181.98         | Decanal                | 7.11e-01 | 0.0001       | 32.45   | 12.05           | 0.16      |
| <i>Alcohols</i>  |            |                 |                        |          |              |         |                 |           |
|                  | 6.61       | 789.38          | 3-Hexanol              | N. S.    | N. S.        | 1.20    | 0.06            | 0.06      |
|                  | 6.71       | 793.09          | 2-Hexanol              | N. S.    | N. S.        | 1.25    | 0.17            | 0.35      |
|                  | 8.39       | 855.21          | (Z)-3-Hexen-1-ol       | 3.76e-06 | 1.10e-05     | 0.00    | 1.20            | 0.00      |
|                  | 11.27      | 847.62          | 3,4-Dimethyl-2-hexanol | 2.07e-09 | 1.45e-08     | 0.00    | 0.20            | 0.00      |
|                  | 14.65      | 1180.49         | 2-Nonen-1-ol           | 1.58e-10 | 1.38e-09     | 0.00    | 1.71            | 1.63      |
|                  | 24.81      | 1393.77         | (E) -Dodecen-1-ol      | 2.50e-05 | 5.48e-05     | 0.00    | 0.07            | 0.00      |

|                     |       |         |                          |          |          |      |      |      |
|---------------------|-------|---------|--------------------------|----------|----------|------|------|------|
|                     | 30.71 | 1670.23 | (E,E)-Farnesol           | 1.43e-13 | 5.02e-12 | 0.00 | 0.00 | 0.13 |
| <i>Esters</i>       |       |         |                          |          |          |      |      |      |
|                     | 10.54 | 924.15  | (Z)-2-Hexen-1-ol acetate | N. S.    | N. S.    | 5.52 | 0.84 | 0.58 |
| <i>Hydrocarbons</i> |       |         |                          |          |          |      |      |      |
|                     | 10.21 | 902.24  | Nonane**                 | 8.09e-03 | 1.42e-02 | 0.55 | 0.21 | 0.00 |
|                     | 11.54 | 1050.05 | (E)-3-Undecene           | 4.01e-08 | 1.76e-07 | 0.00 | 0.06 | 0.00 |
|                     | 12.87 | 1007.85 | <i>p</i> -cymene**       | 7.00e-07 | 2.45e-06 | 0.00 | 0.19 | 0.11 |
|                     | 15.02 | 1098.39 | Undecane**               | 6.41e-08 | 2.49e-07 | 1.89 | 0.00 | 0.52 |
|                     | 19.45 | 1198.75 | Dodecane                 | 3.57e-06 | 1.10e-05 | 0.00 | 0.67 | 0.00 |
|                     | 23.14 | 1291.32 | Tridecane**              | N. S.    | N. S.    | 0.10 | 0.92 | 2.35 |
|                     | 26.11 | 1400.08 | Tetradecane**            | 0.00058  | 0.00078  | 4.19 | 0.12 | 1.23 |
|                     | 27.49 | 1502.79 | Pentadecane**            | 4.05e-05 | 8.34e-05 | 0.00 | 0.29 | 0.04 |
|                     | 29.61 | 1598.90 | Hexadecane**             | 4.58e-10 | 8.02e-09 | 0.00 | 0.00 | 0.31 |
| <i>Monoterpenes</i> |       |         |                          |          |          |      |      |      |
|                     | 10.71 | 928.29  | Alpha-pinene**           | N. S.    | N. S.    | 6.35 | 2.32 | 2.08 |

|                              |         |                      |          |          |      |      |      |
|------------------------------|---------|----------------------|----------|----------|------|------|------|
| 11.05                        | 938.80  | Camphene             | 2.35e-02 | 3.57e-02 | 0.00 | 0.40 | 0.44 |
| 11.76                        | 965.77  | Beta-Pinene**        | N. S.    | N. S.    | 3.57 | 1.61 | 1.69 |
| 12.31                        | 983.32  | Beta-Myrcene         | 0.00018  | 0.00026  | 3.67 | 0.11 | 0.61 |
| 12.48                        | 992.44  | Alpha-Phellandrene** | 9.30e-03 | 1.55e-02 | 0.00 | 0.21 | 0.22 |
| 12.61                        | 900.41  | 3-Carene**           | 1.75e-05 | 4.09e-06 | 0.00 | 0.12 | 0.19 |
| 13.11                        | 1017.04 | D-Limonene           | N. S.    | N. S.    | 0.75 | 0.66 | 1.04 |
| 16.17                        | 1081.92 | Beta-Linalool        | 3.51e-04 | 6.83e-04 | 0.54 | 0.17 | 0.00 |
| <b><i>Benzenoids</i></b>     |         |                      |          |          |      |      |      |
| 21.16                        | 1224.42 | Indole**             | 2.89e-08 | 1.58e-07 | 0.00 | 0.59 | 0.00 |
| <b><i>Sesquiterpenes</i></b> |         |                      |          |          |      |      |      |
| 24.11                        | 1481.53 | Alpha-Ylangene       | 7.54e-03 | 1.39e-02 | 1.45 | 0.18 | 0.00 |
| 24.19                        | 1383.31 | Alpha-Longipinene    | 2.09e-02 | 3.32e-02 | 0.60 | 0.18 | 0.00 |
| 25.54                        | 1407.95 | Beta-Caryophyllene** | 0.00321  | 0.00416  | 2.85 | 0.51 | 0.40 |
| 26.22                        | 1445.77 | (E)-Beta-Farnesene   | 7.57e-06 | 2.04e-05 | 0.00 | 0.46 | 0.00 |
| 27.92                        | 1512.79 | Alpha-Cubebene       | 7.09e-10 | 8.27e-09 | 6.41 | 0.00 | 0.00 |

---



755 R.T. – Retention time.

756 N.S. – Not significant.

757 \* ng. g of dry plant tissue<sup>-1</sup>.

758 \*\*Confirmed using a standard compound



**M 1 2 3 4 5 6 7 8 9**

**360 bp →**

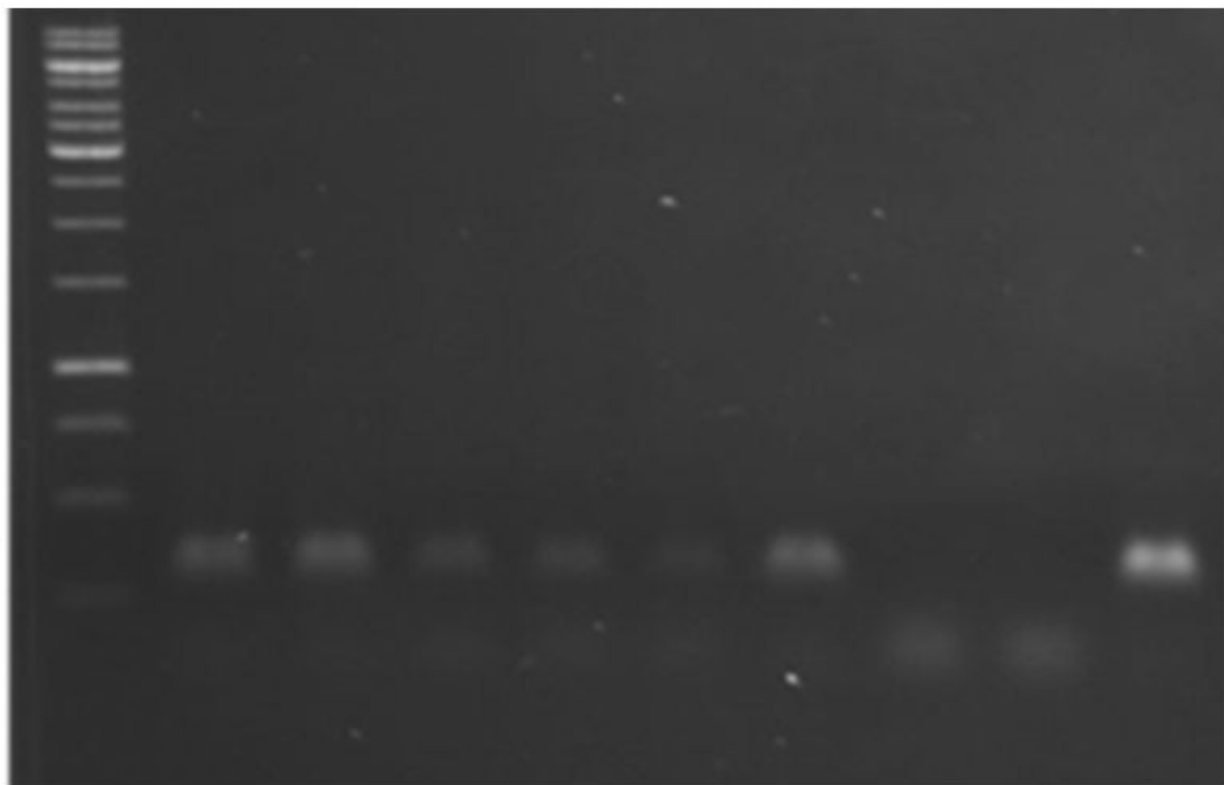

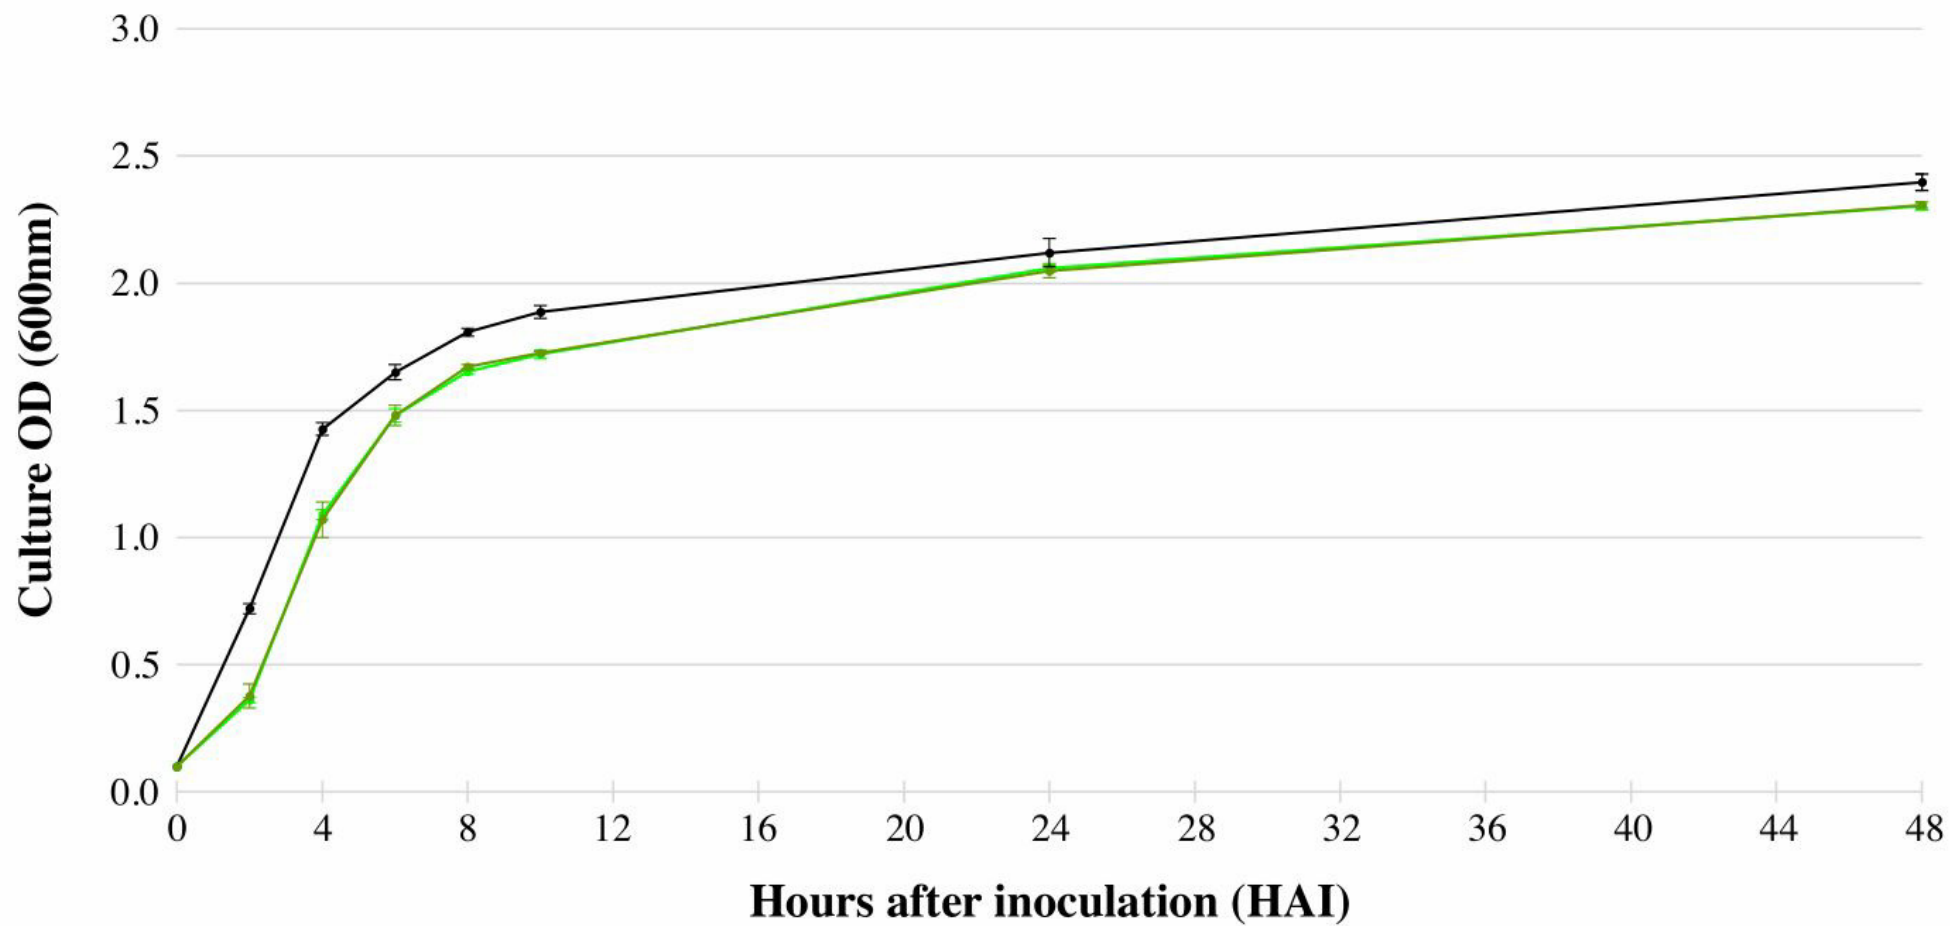

—●— RZ2MS9

—●— RZ2MS9-GFP

—●— RZ2MS9-GFP (Kn)

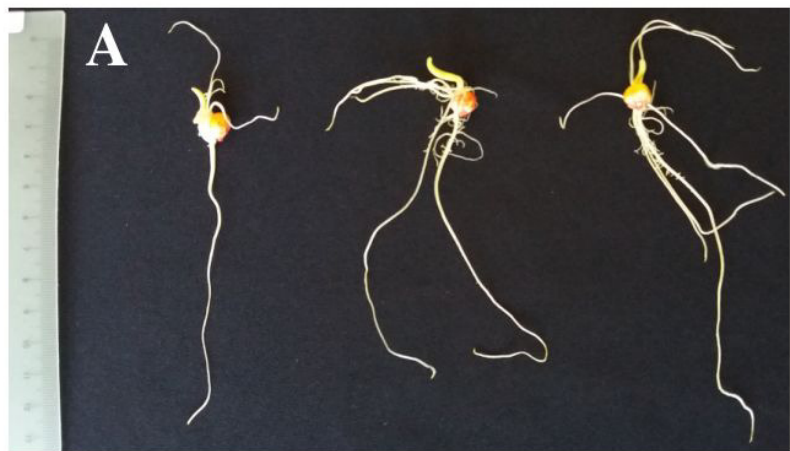

Control RZ2MS9 wt RZ2MS9-GFP

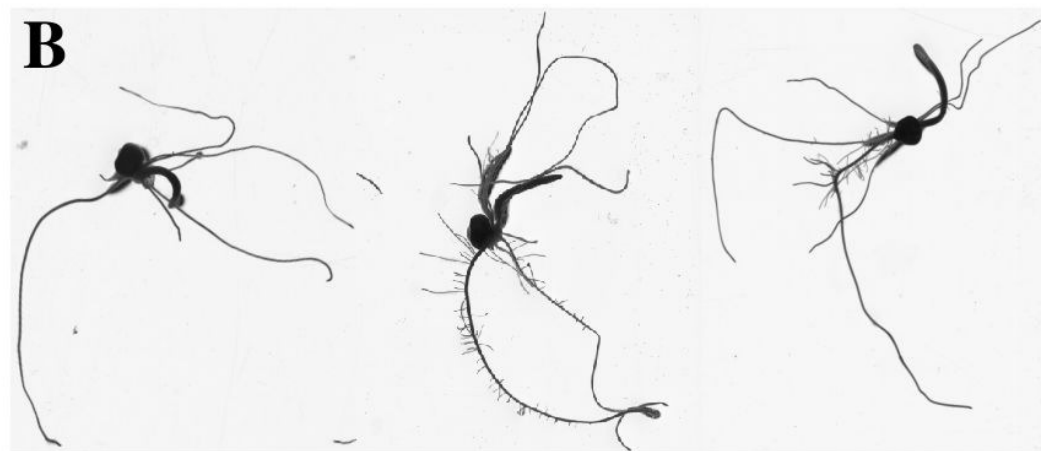

Control RZ2MS9 wt RZ2MS9-GFP

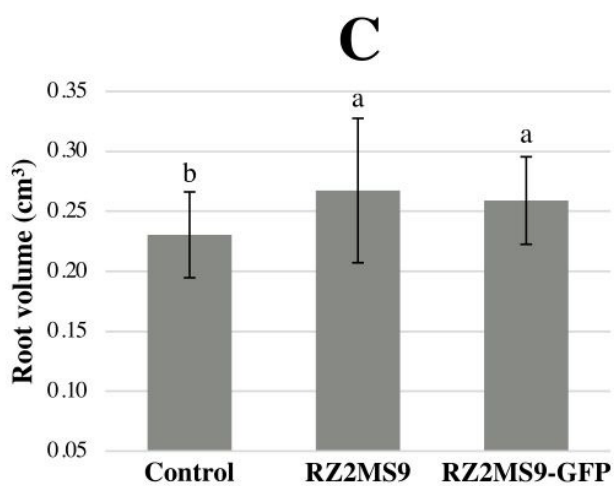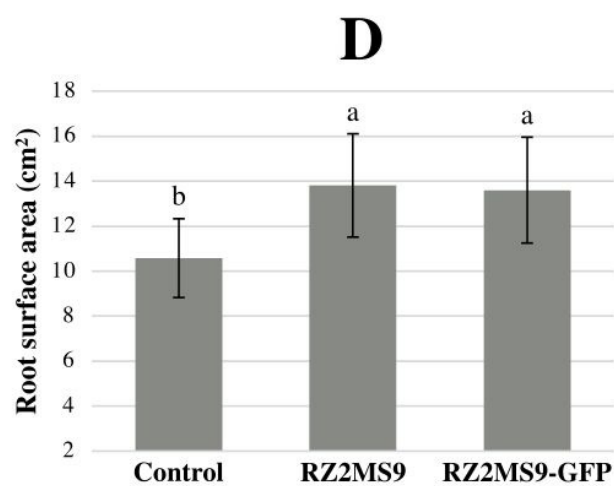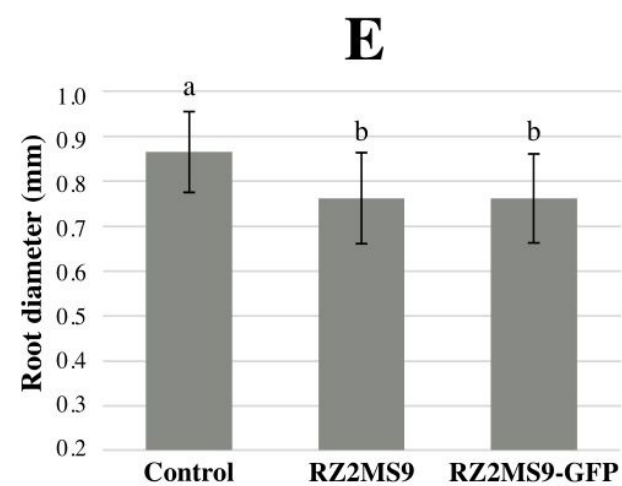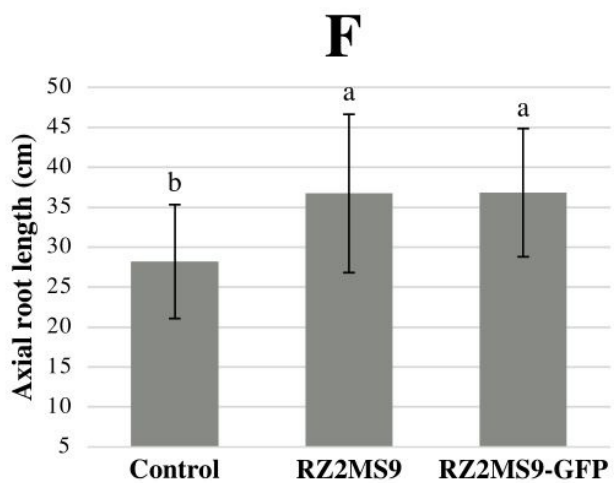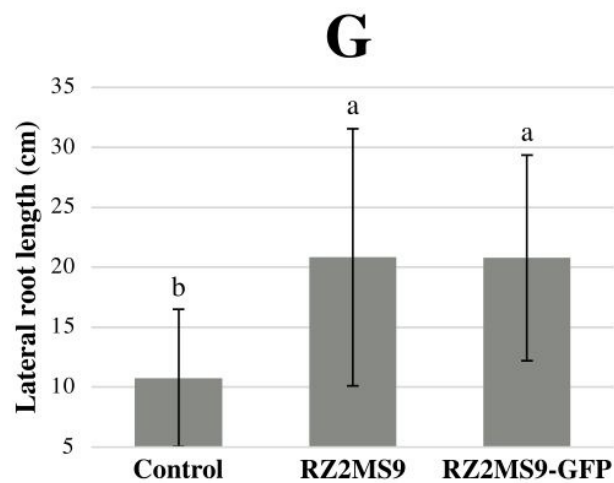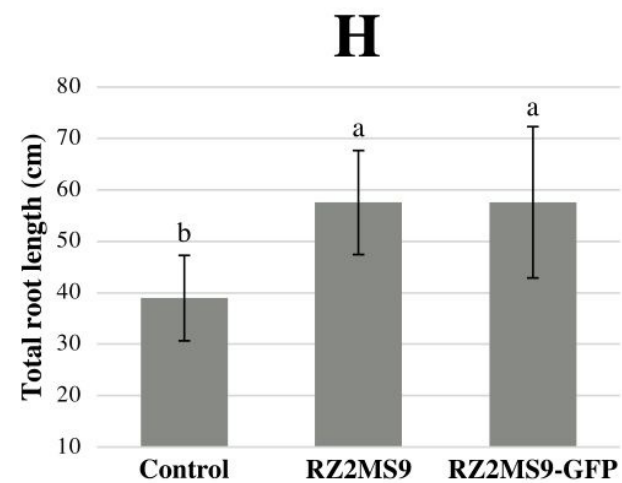

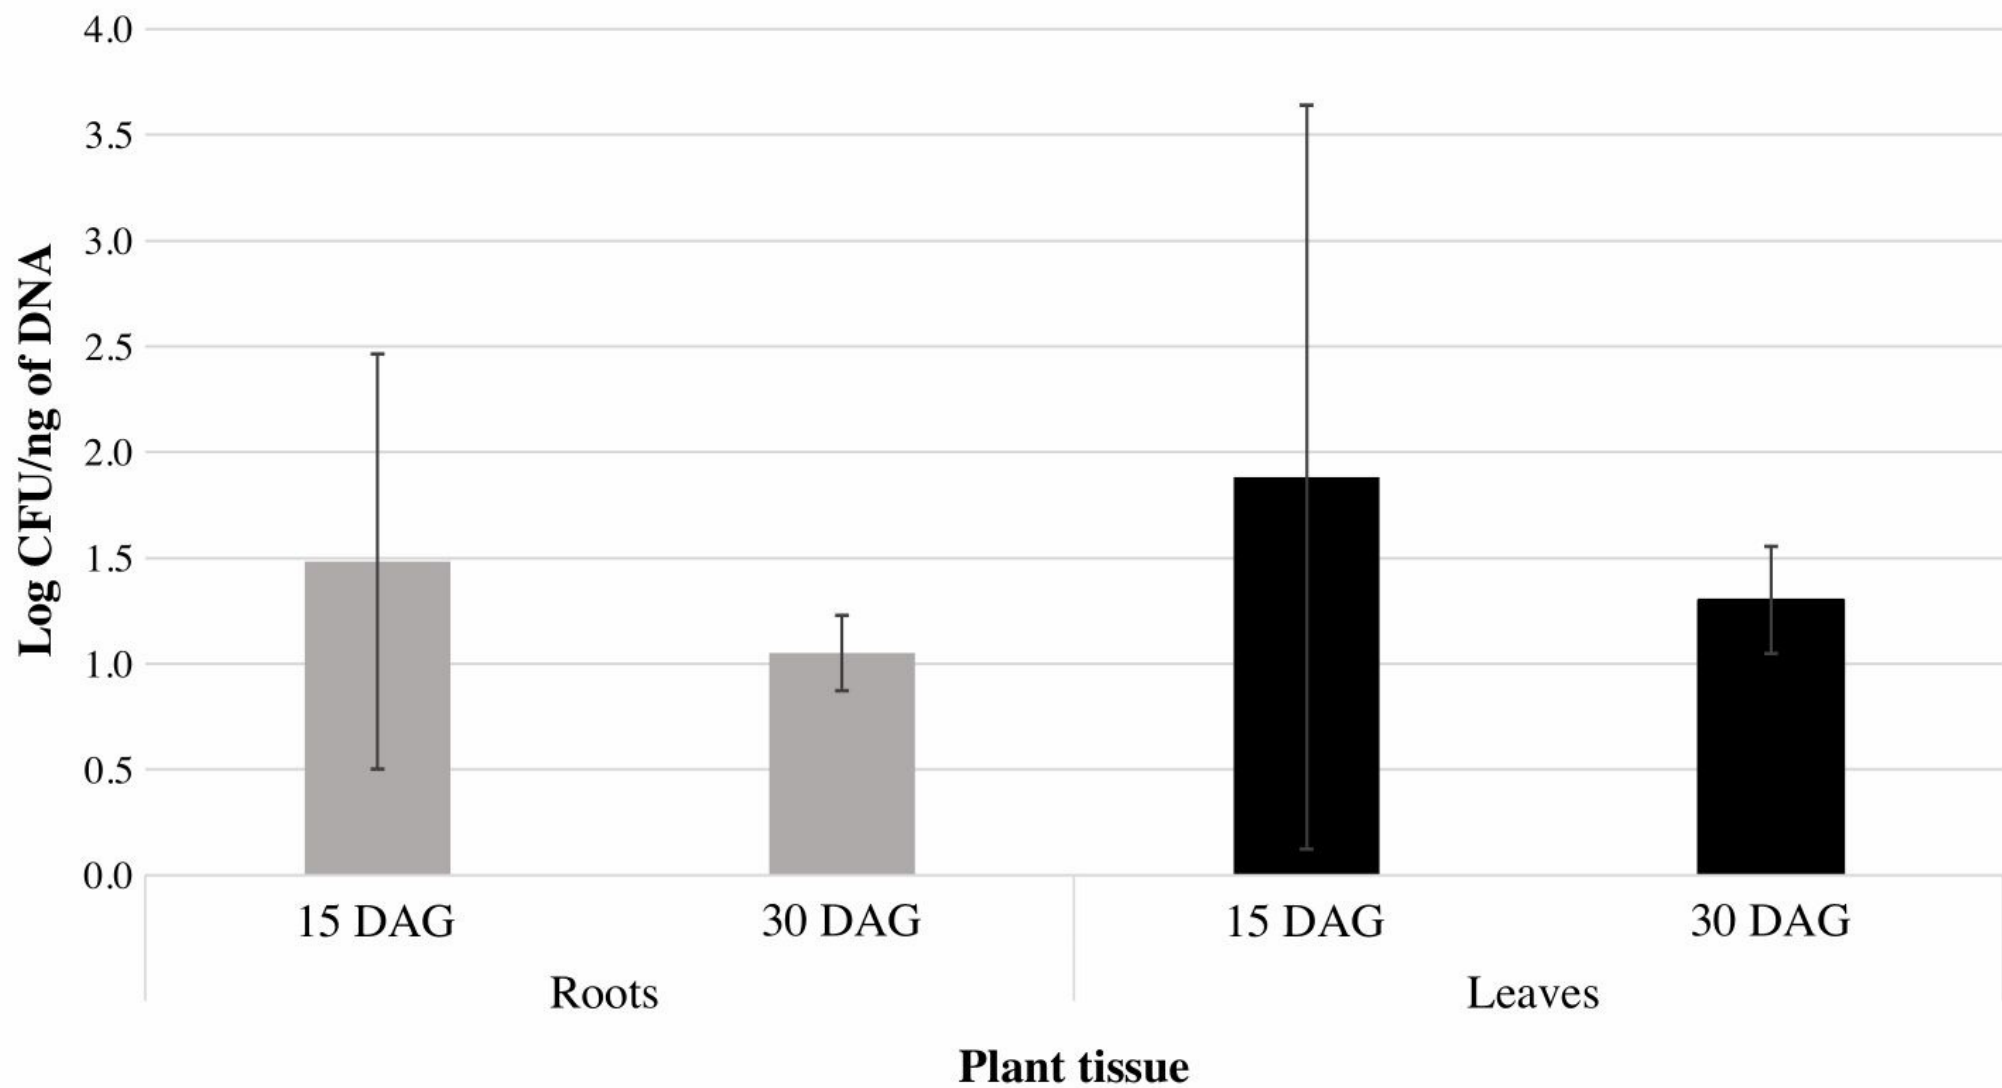

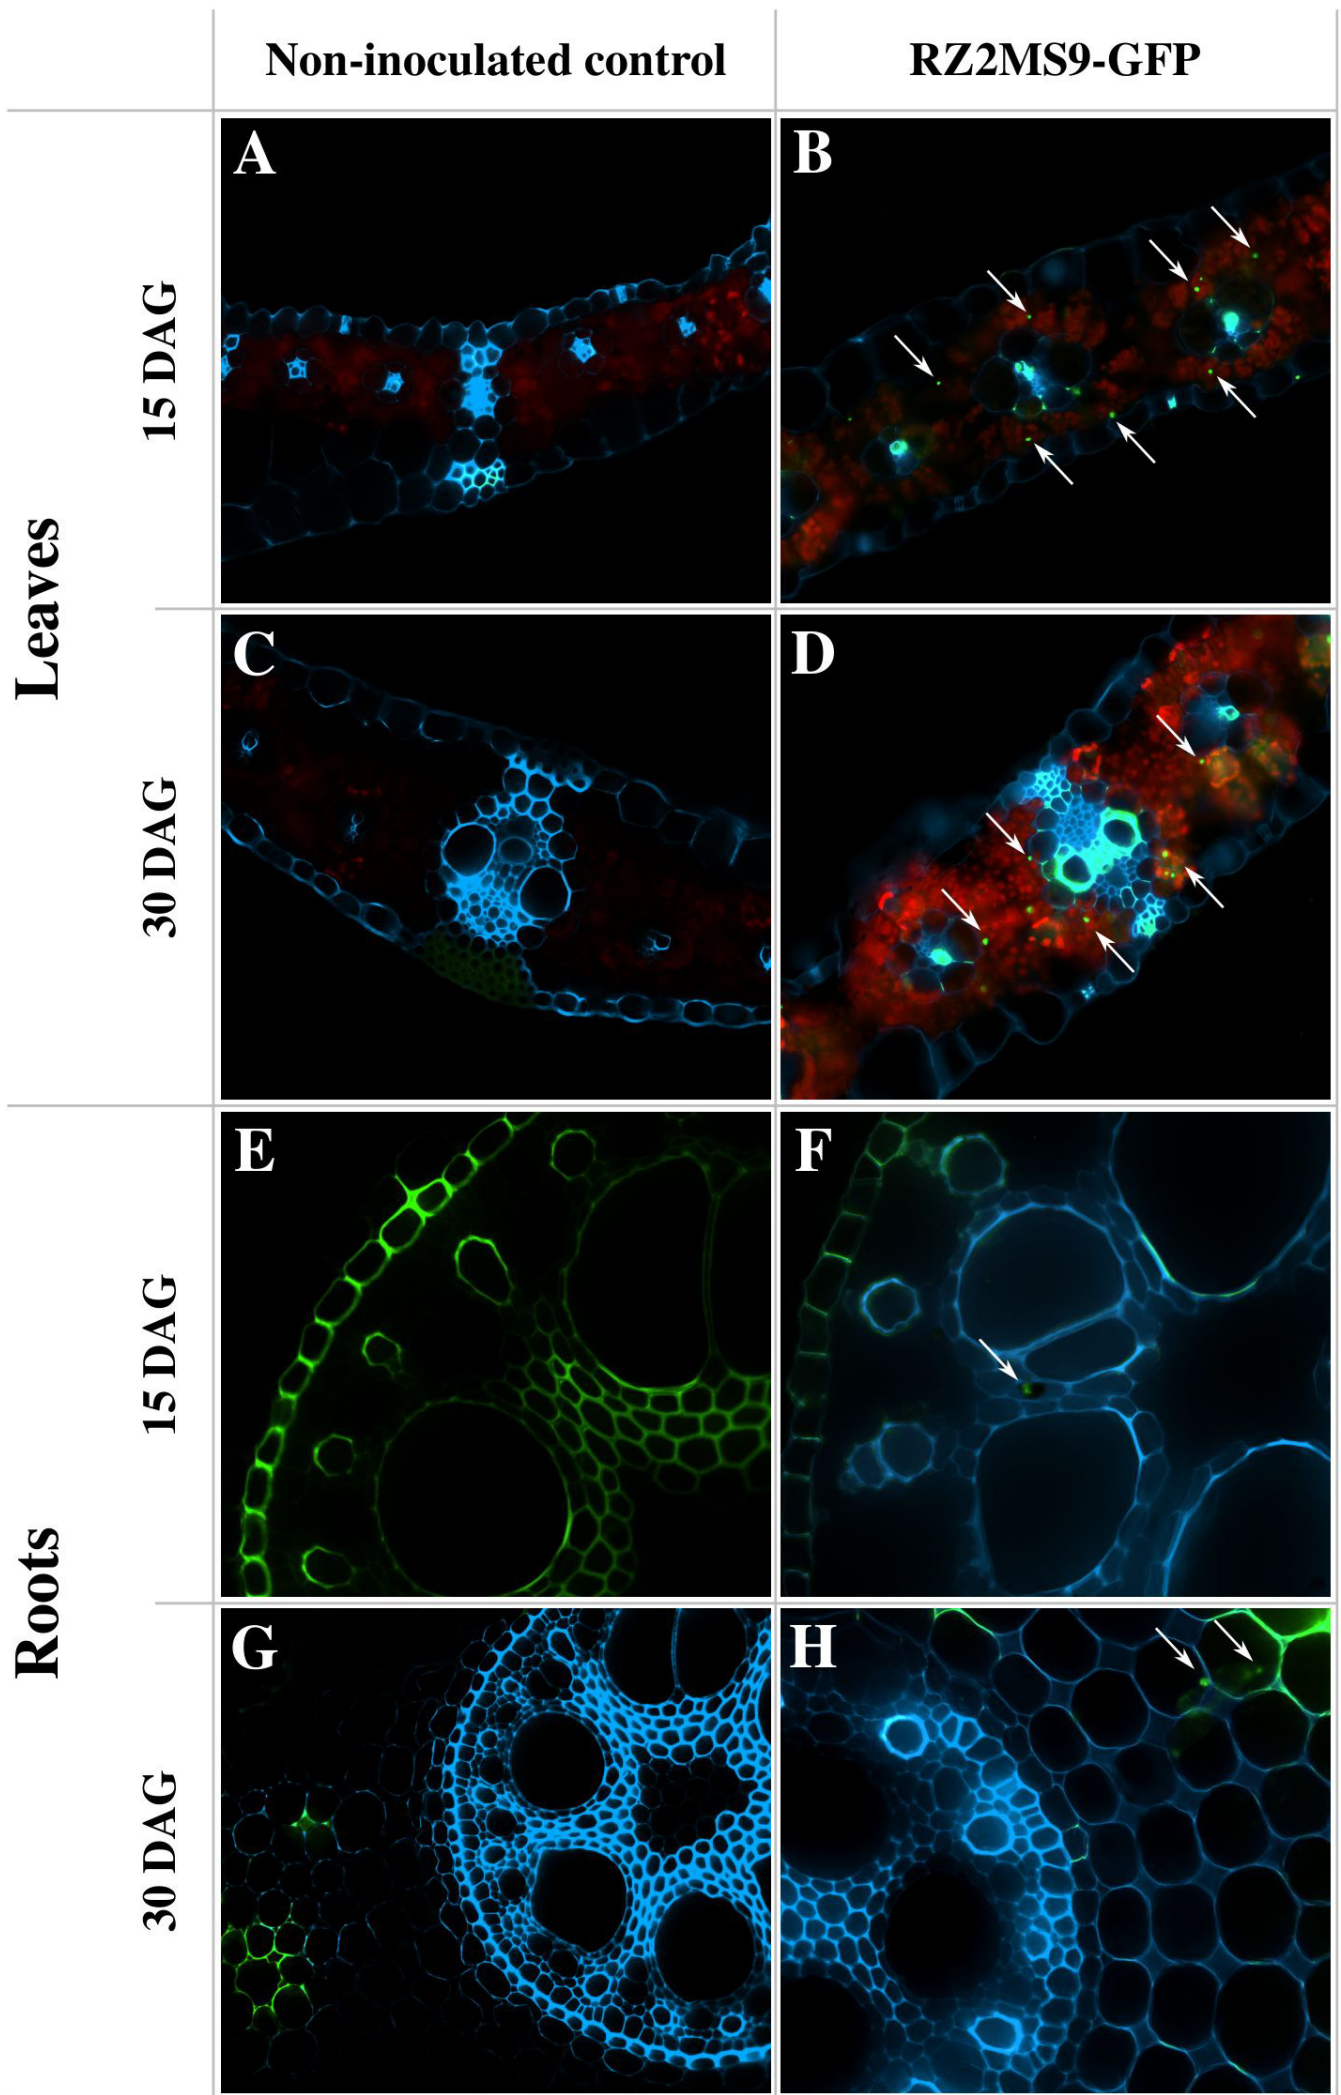

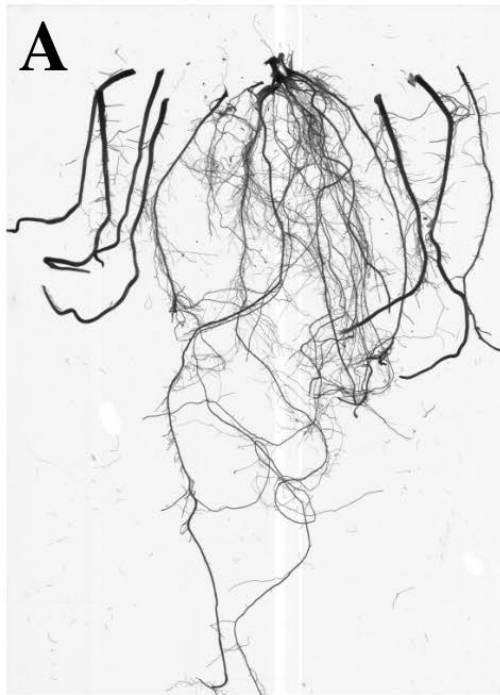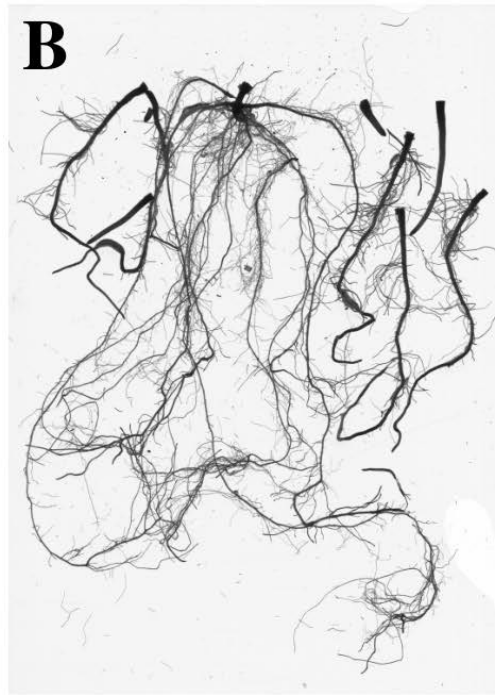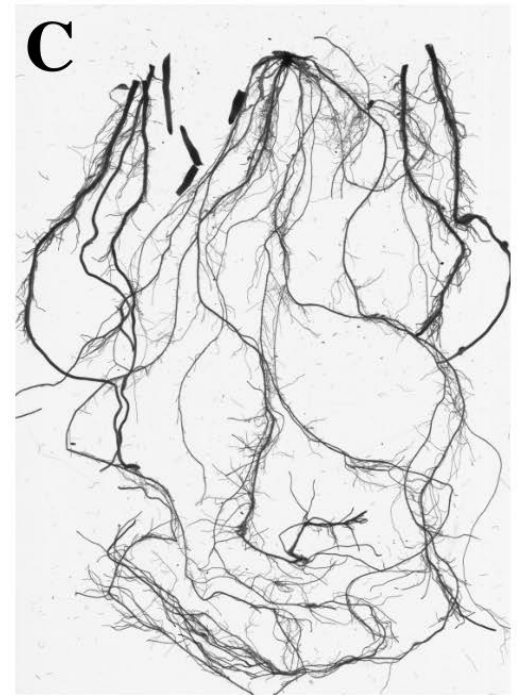

**D**

| Parameters                                  | Treatments    |                       |                       |
|---------------------------------------------|---------------|-----------------------|-----------------------|
|                                             | Control       | RZ2MS9                | RZ2MS9-Ab-V5          |
| Root length (cm)                            | 19.54 ± 04.88 | 21.66 ± 08.65         | 21.44 ± 04.68         |
| Root projected area (cm <sup>2</sup> )      | 00.94 ± 00.20 | 01.09 ± 00.45         | 01.14 ± 00.21         |
| Root surface area (cm <sup>2</sup> )        | 02.95 ± 00.63 | 03.44 ± 01.41         | 03.58 ± 00.68         |
| Root diameter (mm)                          | 00.48 ± 00.02 | 00.50 ± 00.03         | <b>00.54 ± 00.03*</b> |
| Root length per volume (cm/m <sup>3</sup> ) | 19.64 ± 04.88 | 21.66 ± 08.65         | 21.44 ± 04.68         |
| Root volume (cm <sup>3</sup> )              | 03.57 ± 00.68 | 04.37 ± 01.87         | <b>04.78 ± 00.90*</b> |
| Shoot height (cm)                           | 66.25 ± 05.56 | <b>81.08 ± 02.49*</b> | <b>79.66 ± 09.64*</b> |
| Stem diameter (mm)                          | 06.99 ± 01.42 | 07.08 ± 01.11         | 07.27 ± 01.05         |
| Dry weight of shoots (g)                    | 02.75 ± 01.12 | <b>04.58 ± 02.37*</b> | <b>04.94 ± 01.47*</b> |
| Dry weight of roots (g)                     | 40.52 ± 11.90 | <b>57.00 ± 27.40*</b> | <b>61.16 ± 16.98*</b> |



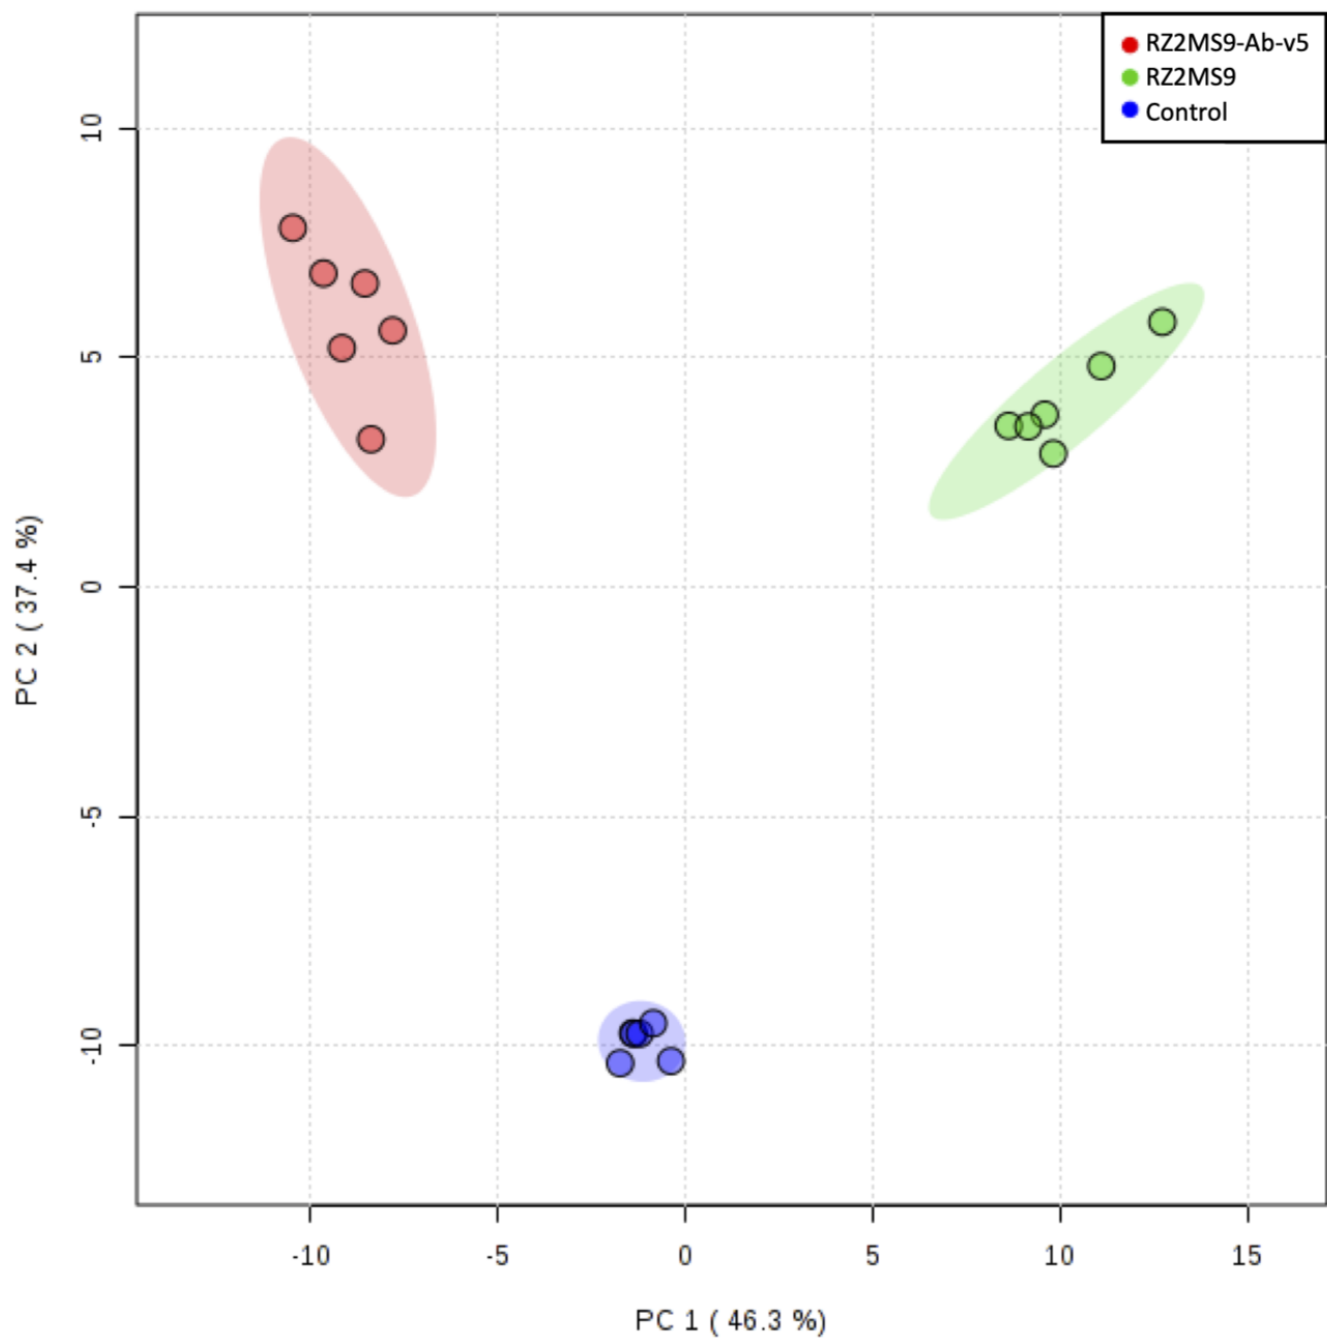

Source: https://www.biorxiv.org/content/biorxiv/early/2021/01/07/2021.01.04.425352.full.pdf
